# Supplementary material for: Turn-off luminescence sensing, white light emission and magnetic studies of two-dimensional lanthanide MOFs
Source: Royal Society of Chemistry journal article supplement (doi:10.1039/d3dt01882b), 2023-01-01
Supplement: d3dt01882b1.pdf [file d3dt01882b1.pdf]

## **Turn off Luminescence Sensing, White – Light Emission and Magnetic Studies on Two-Dimensional lanthanide MOFs**

Krishna Manna<sup>[a]</sup>, Jean-Pascal Sutter<sup>[b]\*</sup> and Srinivasan Natarajan<sup>[a]\*</sup>

### **ELECTRONIC SUPPLEMENTARY INFORMATION**

(a) Ms. Krishna Manna, Prof. Srinivasan Natarajan:

Framework solids Laboratory, Solid State and Structural Chemistry Unit

Indian Institute of Science

Bangalore 560012 (India)

Email: snatarajan@iisc.ac.in

Homepage: <http://sscu.iisc.ac.in/people/frameworkslab/>

(b) Prof. Jean-Pascal Sutter

Laboratoire de Chimie de Coordination du CNRS

Université de Toulouse, CNRS

205 route de Narbonne, 31077 Toulouse (France)

E-mail : jean-pascal.sutter@lcc-toulouse.fr

## Materials

The chemicals required for the synthesis of the compounds:  $\text{La}(\text{NO}_3)_3 \cdot x\text{H}_2\text{O}$  ( $\text{Ln} = \text{Y}, \text{Eu}, \text{Gd}, \text{Tb}, \text{Dy}$ ) propargyl bromide (80 wt% in toluene, 0.3% magnesium oxide as stabilizer) (Sigma-Aldrich); the compounds for the catalytic studies and 2, 5-dihydroxyterephthalic acid (TCD); THF, DMF, EtOH, KOH, MeOH, HCl (SDFine, India). The organophosphorus pesticides and nitroaromatics (Sigma) were used as purchased without any purifications. The water used was double distilled through a Millipore membrane. All the chemicals were used as purchased without any further purifications.

## Synthetic procedure of the Ligand and MOF Compounds

The primary ligand, 2,5-bis(prop-2-yn-1-yloxy) terephthalic acid (2, 5 BPTA) was prepared by employing a known procedure.<sup>1</sup>

All the compounds were prepared by the sequential layering of three different solutions. The lanthanide nitrates,  $\text{Ln}(\text{NO}_3)_3 \cdot x\text{H}_2\text{O}$ , (0.05 mmol,  $\sim 0.020$  g) was dissolved in 1 mL water (Solution **A**). Buffer solution (1 mL) was prepared by mixing 1:1  $\text{H}_2\text{O}$  and DMF (Solution **B**). 2, 2' Bipyridine (0.05 mmol, 0.008 g, compound **1a-5a**) or 1, 10 phenanthroline (0.05 mmol, 0.009 g, compound **1b-5b**) was dissolved in the buffer solution. The ligand 2,5-BPTA (0.05 mmol, 0.013 g) was dissolved in 1 mL of N, N-DMF (Solution **C**). In a Teflon-capped reaction vessel, solution **A** (1 mL) containing the lanthanide salt was added at the bottom. Then, 1 mL of solution **B** was carefully layered on the top of solution **A** followed by the addition of 1 mL of solution **C**. The reaction vessel was closed with a cap, and kept undisturbed in an oven at 75 °C for 3-7 days. In the case of 2, 2' bipyridine, large amount of cubic block shaped colourless crystals were isolated after 7 days. In case of 1, 10 phenanthroline, products with similar morphology came after 3 days. The yield in all cases was found to be in the range of  $\sim 60 - 70$  % with respect to the lanthanide ions. Elemental analysis for all the compounds is listed in

Table S1. Powder X-ray diffraction (PXRD) studies (Figure S1) has confirmed the phase purity of the prepared samples. The mixed metal compounds were also prepared employing a similar procedure (Figure S2, S3).

**Table S1A.** Synthesis of compound 1-5 in layering method

| Compound               | Layer A                                                                                         | Layer B                                                                                      | Layer C                                      | Temp (°C) | Time (days) | Shape and colour of crystal |
|------------------------|-------------------------------------------------------------------------------------------------|----------------------------------------------------------------------------------------------|----------------------------------------------|-----------|-------------|-----------------------------|
| <b>Compounds 1a-5a</b> | Ln(NO <sub>3</sub> ) <sub>3</sub> ·xH <sub>2</sub> O salt (0.020 g, 0.05 mmol) in 1 mL of water | 2, 2'-bipyridine (0.008 g, 0.05 mmol) dissolved in the 1 mL buffer solution of DMF and water | 2,5 BPTA (0.013 g, 0.05 mmol) in 1 mL of DMF | 75        | 7           | Colourless, cubic           |
| <b>Compounds 1b-5b</b> | Ln(NO <sub>3</sub> ) <sub>3</sub> ·xH <sub>2</sub> O salt (0.020 g, 0.05 mmol) in 1 mL of water | 1, 10 phenanthroline, (0.009 g, 0.05 mmol) in the 1 mL buffer solution of DMF and water      | 2,5 BPTA (0.013 g, 0.05 mmol) in 1 mL of DMF | 75        | 3           | Colourless, cubic           |

**Table S1B** Elemental Analysis of Compound 1-5 (a, b)

| Compound    | %C             |       | %H             |       | %N             |       | %O             |       |
|-------------|----------------|-------|----------------|-------|----------------|-------|----------------|-------|
|             | As Synthesized | Calc. |
| Compound 1a | 55.34          | 55.46 | 3.12           | 3.3   | 4.35           | 4.17  | 23.07          | 23.83 |
| Compound 2a | 49.87          | 50.69 | 2.93           | 3.02  | 4.01           | 3.81  | 21.95          | 21.78 |
| Compound 3a | 50.19          | 50.33 | 2.86           | 3.00  | 3.85           | 3.79  | 21.41          | 21.63 |
| Compound 4a | 50.13          | 50.22 | 2.53           | 2.99  | 4.01           | 3.78  | 21.55          | 21.58 |
| Compound 5a | 49.34          | 49.98 | 2.71           | 2.98  | 3.9            | 3.76  | 21.6           | 21.47 |
| Compound 1b | 56.84          | 56.99 | 2.99           | 3.19  | 4.1            | 4.03  | 23.41          | 23.01 |
| Compound 2b | 52.71          | 52.26 | 2.59           | 2.92  | 3.81           | 3.69  | 20.71          | 21.09 |
| Compound 3b | 52.06          | 51.89 | 2.53           | 2.9   | 3.86           | 3.67  | 20.69          | 20.95 |
| Compound 4b | 52.09          | 51.78 | 2.78           | 2.9   | 3.76           | 3.66  | 20.21          | 20.91 |
| Compound 5b | 51.76          | 51.54 | 2.5            | 2.88  | 3.66           | 3.64  | 20.85          | 20.80 |

**Table S2a** Selected bond lengths (Å) and bond angles (deg) for **3a**, Gd containing 2, 2'-bipyridine MOF.

**Table S2b** Selected bond lengths (Å) and bond angles (deg) for **5b**, Dy containing 1,10-

| Compound 3a       |         |                     |            |
|-------------------|---------|---------------------|------------|
| Bond length(Å)    |         | Bond angle (°)      |            |
| Gd1-O1_4          | 2.36(4) | O1_4-Gd1-N1_5       | 76.71(15)  |
| Gd1-O1_5          | 2.36(4) | O1_4-Gd1-N1_2       | 147.89(17) |
| Gd1-N1_3          | 2.54(5) | O1_4-Gd1-N1'_4      | 177.49(15) |
| Gd1-N1'_4         | 2.57(4) | O1_3a-Gd1-N1_24     | 82.66(16)  |
| Gd1-N1_32a        | 2.40(6) | O2_3-Gd1-N1_4       | 91.62(13)  |
| Gd1-O2_2a         | 2.40(4) | O1_4-Gd1-O2_4 b     | 132.88(12) |
| Gd1-O2_4 b        | 2.58(4) | O1_4-Gd1-O2_4 b     | 122.95(14) |
| Gd1-O2_4 b        | 2.49(3) | O1_4-Gd1-O2_4 b     | 68.44(13)  |
| Gd1-O2_4 b        | 2.38(5) | O1_35-Gd1-N1_52c    | 80.20(16)  |
| Dy1-O1_5 c        | 2.38(4) | O1_35-Gd1-O2'_52c   | 134.27(13) |
| Dy1-O2_5 c        | 2.43(3) | O1_34a-Gd1-N1_25    | 147.32(15) |
|                   |         | O2_3-Gd1-N1_2       | 148.43(14) |
|                   |         | O2_4 b-Gd1-O1_4     | 68.85(14)  |
|                   |         | O2_4 b-Gd1-O4_6     | 72.47(12)  |
|                   |         | O1_4-Gd1-O2_4 b     | 136.34(14) |
|                   |         | N1_42-Gd1-N1'_52c   | 69.89(13)  |
|                   |         | O1_4-Gd1-N1_5_2     | 79.39(15)  |
|                   |         | O2_3-Gd1-N1_2       | 83.44(16)  |
|                   |         | O2_4 b-Gd1-N1_2     | 127.82(16) |
|                   |         | O2_4 b-Gd1-N1_2     | 120.24(18) |
|                   |         | O2_4 b-Gd1-N1_2     | 138.86(15) |
|                   |         | O1_3 a-Gd1-N1'_2    | 814.82(15) |
|                   |         | O2_3 a-Gd1-N1'_2    | 75.03(14)  |
|                   |         | O2_4 b-Gd1-N1_0_2   | 107.12(16) |
|                   |         | O2_4 b-Gd1-N1_0_2   | 88.56(13)  |
|                   |         | O2_4 b-Gd1-N1_0_2   | 66.00(15)  |
|                   |         | O1_3 a-Gd1-O2_2a    | 59.92(14)  |
|                   |         | O2_3 a-Gd1-N1_0_2 b | 136.58(13) |
|                   |         | O2_3 b-Gd1-O2_4 b   | 143.87(14) |
|                   |         | O2_3 b-Gd1-O2_4 b   | 124.03(14) |
|                   |         | O2_3 b-Gd1-O1_4 b   | 153.58(14) |
|                   |         | O2_3 b-Gd1-O2_4 b   | 143.04(14) |
|                   |         | O2_4 b-Gd1-O2_4 b   | 82.41(14)  |
|                   |         | O1_4 b-Gd1-O2_4 b   | 148.13(14) |
|                   |         | O1_4 b-Gd1-O2_5 b   | 148.98(15) |
|                   |         | O2_4 b-Gd1-O2_5 b   | 142.28(14) |
| a = 1-x, 1-y, 1-z |         | O1_5 c-Dy1-O2_5 c   | 132.58(16) |
| b ≡ 1-x, 1-y, 1-z |         |                     |            |
| c = 1-x, 2-y, 1-z |         |                     |            |

phenanthroline MOF



**Table S4** Hydrogen bonding for **3a** compound

| D-H...A (Å)        | d(D-H)<br>(Å) | d(H-A) (Å) | d(D...A) (Å) | ∠DHA (°) | Symmetry transforms |
|--------------------|---------------|------------|--------------|----------|---------------------|
| <b>Compound 3a</b> |               |            |              |          |                     |
| C3' 2-H3' 2...O1 6 | 0.95          | 2.57       | 3.49(9)      | 165.00   | x,y,1+z             |
| C2 6-H2A 6...O1 8  | 0.99          | 2.44       | 3.42(6)      | 170.00   | 1-x,1-y,1-z         |
| C2 6-H2A 6...O1 7  | 0.99          | 2.56       | 3.52(6)      | 165.00   | 1-x,1-y,1-z         |
| C4 6-H4 6...O1 1   | 0.95          | 2.10       | 3.04(19)     | 170.00   | 1+x,y,z             |
| C4 9-H4 9...O1 1   | 0.95          | 2.19       | 3.09(2)      | 157.00   | 1-x,2-y,-z          |

| Compound              | $\nu(\equiv\text{C}-\text{H})$<br>( $\text{cm}^{-1}$ ) | $\nu(\text{C}\equiv\text{C})$<br>( $\text{cm}^{-1}$ ) | $\nu(\text{COO})$<br>acid<br>( $\text{cm}^{-1}$ ) | $\nu(\text{C}=\text{C})$<br>( $\text{cm}^{-1}$ ) | $\nu(\text{C}=\text{N})$<br>( $\text{cm}^{-1}$ ) | $\nu(\text{O}-\text{H})_{\text{str non}}$<br>coordinated<br>$\text{H}_2\text{O}$<br>( $\text{cm}^{-1}$ ) | $\nu(\text{C}-\text{H})$<br>Aromatic |
|-----------------------|--------------------------------------------------------|-------------------------------------------------------|---------------------------------------------------|--------------------------------------------------|--------------------------------------------------|----------------------------------------------------------------------------------------------------------|--------------------------------------|
| 2,5 BPTA              | ~3261                                                  | ~2126                                                 | ~1693                                             |                                                  | -                                                | -                                                                                                        |                                      |
| Compound <b>1a-5a</b> | ~3243                                                  | ~2117                                                 | ~1657                                             | ~1584                                            | ~1528                                            | ~3640                                                                                                    | ~3060                                |
| Compound <b>1b-5b</b> | ~3309                                                  | ~2127                                                 | ~1670                                             | ~1610                                            | ~1539                                            | ~3400-3300-                                                                                              | ~3065                                |
| 2, 2' Bipyridine      | -                                                      | -                                                     | -                                                 | ~1578                                            | ~1557                                            | -                                                                                                        | ~3052                                |
| 1, 10 phenanthroline  | -                                                      | -                                                     | -                                                 | ~1644                                            | ~1586                                            | ~3363                                                                                                    | ~3056                                |

**Table S5.** List of important IR bands observed in **1-5(a, b)**

The IR spectra of the ligand, 2, 5 BPTA, (Figure S5a) exhibits a sharp band at  $3261 \text{ cm}^{-1}$ , which can be assigned to the stretching of the alkyne  $\equiv\text{C}-\text{H}$  group. The band at  $2126 \text{ cm}^{-1}$  corresponds to the  $\text{C}\equiv\text{C}$  stretching. A broad band in the  $3000-2780 \text{ cm}^{-1}$  corresponds to the aromatic  $\text{C}-\text{H}$  stretching from the benzene ring and the stretching of the methylene group. The IR spectra of 2, 2' - bipyridine and 1, 10 – phenanthroline shows aromatic stretching bands at  $3052$  and  $3056 \text{ cm}^{-1}$ . The typical  $\text{C}=\text{C}$  and  $\text{C}=\text{N}$  frequency appears at  $1584$  and  $1528 \text{ cm}^{-1}$  for bipyridine and  $1610$ ,  $1539 \text{ cm}^{-1}$  for phenanthroline. For the compound **1a-5a**, a sharp peak at  $\sim 3640 \text{ cm}^{-1}$  corresponds to the stretching frequency of the lattice water molecule. Also, the  $\text{C}=\text{N}$  stretching frequency appears to be red shifted to  $1528 \text{ cm}^{-1}$  for the electron donation from N to the metal centres. For compounds **1b-5b**, also, the  $\text{C}=\text{N}$  bond appears at  $\sim 1539 \text{ cm}^{-1}$  which is red shifted from the uncoordinated phenanthroline. There are previous reports in this kind of observations.<sup>2-4</sup> In addition to these, other IR bands that corresponds to  $-\text{C}=\text{O}$ ,  $\equiv\text{C}-\text{H}$ ,  $\text{C}\equiv\text{C}$  etc. have been observed. All the observed IR bands were listed in Table S5.





**Table S6.** List of UV-Vis spectra observed in 1-5 (a, b)

| SI No:        | Compound              | Wavelength (nm) | Optical transition                     |
|---------------|-----------------------|-----------------|----------------------------------------|
| <b>UV-Vis</b> |                       |                 |                                        |
| 1             | Ligand                | 278<br>340      | $\pi\text{-}\pi^*$<br>$n\text{-}\pi^*$ |
| 2             | 2, 2' bipyridine      | 232<br>285      | $\pi\text{-}\pi^*$<br>$n\text{-}\pi^*$ |
| 3             | 1, 10 phenanthroline  | 256<br>330      | $\pi\text{-}\pi^*$<br>$n\text{-}\pi^*$ |
| 4             | Compound <b>1a-5a</b> | ~280<br>312-365 | $\pi\text{-}\pi^*$<br>$n\text{-}\pi^*$ |
| 5             | Compound <b>1b-5b</b> | ~290<br>311-364 | $\pi\text{-}\pi^*$<br>$n\text{-}\pi^*$ |

The room temperature UV-Vis spectra of the ligand (Figure S6a) showed absorption bands corresponding to the  $\pi\text{-}\pi^*$  (278 nm) and the  $n\text{-}\pi^*$  (340 nm) transitions. For the 2, 2' bipyridine, the bands are observed at  $\lambda_{\text{max}}$  235 and 282 nm for the  $\pi\text{-}\pi^*$  and  $n\text{-}\pi^*$  transitions. Compared to 2,2'-bipyridine, 1,10-phenanthroline possesses a more rigid geometry with the three aromatic rings substantially coplanar and the two nitrogen atoms in juxtaposition.<sup>5</sup> This means that with a greater extent of conjugation, less energy is needed (and the longer the wavelength of radiation) to excite an electron for the  $\pi \rightarrow \pi^*$  transition, so that extensively conjugated compounds can absorb longer wavelength. Here, the rigidity of phenanthroline is reflected in the structured UV absorption spectral features, where we observed the  $\lambda_{\text{max}}$  256 and 330 nm for the  $\pi\text{-}\pi^*$  and  $n\text{-}\pi^*$  transitions.<sup>6,7</sup> Compound **1a-5a** exhibited a red-shift in the UV-Vis spectra of both the  $\pi\text{-}\pi^*$  and  $n\text{-}\pi^*$  transitions at 280 and 320-350 nm. On the other hand, the UV-Vis spectra of the phenanthroline complexes showed the bands at ~290 nm for the  $\pi \rightarrow \pi^*$  transition and 311-364 nm for the  $n\text{-}\pi^*$  transitions.<sup>8</sup> Here in individual peaks are not observed for the ligand, metal and the bipyridine; a overall broad band is observed due to the overlapping of the absorption spectra. Similar kind of observations has been made before.<sup>9</sup> All the observed UV-Vis band is tabulated in Table S6.

**Table S7.** CIE chromaticity coordinates (x, y) for  $Y_{0.98-x}Tb_{0.02}Eu_x$ - MOF material samples with

| <b><math>Y_{1-0.02-x}Tb_{0.02}Eu_x</math> (x = 0.0, 0.5, 1.0, 2.0, 3.0, 4.0 %)</b>      |              |              |                |
|-----------------------------------------------------------------------------------------|--------------|--------------|----------------|
| <b>Sample code</b>                                                                      | <b>CIE X</b> | <b>CIE Y</b> | <b>CCT (K)</b> |
| <b>0.0% Eu</b>                                                                          | 0.252        | 0.455        | 7885           |
| <b>0.5 % Eu</b>                                                                         | 0.286        | 0.423        | 6986           |
| <b>1.0 % Eu</b>                                                                         | 0.303        | 0.391        | 6560           |
| <b>2.0 % Eu</b>                                                                         | <b>0.33</b>  | <b>0.345</b> | <b>5604</b>    |
| <b>3.0 % Eu</b>                                                                         | 0.370        | 0.312        | 3766           |
| <b>4.0 % Eu</b>                                                                         | 0.411        | 0.295        | 2273           |
| <b><math>Y_{1-0.06-x}Tb_{0.06}Eu_x</math> (x = 0.0, 0.05, 0.10, 0.20, 0.30, 0.40 %)</b> |              |              |                |
| <b>0.0% Eu</b>                                                                          | 0.22         | 0.431        | 9444           |
| <b>0.05 % Eu</b>                                                                        | 0.291        | 0.391        | 7035           |
| <b>0.1 % Eu</b>                                                                         | <b>0.332</b> | <b>0.331</b> | <b>5517</b>    |
| <b>0.2 % Eu</b>                                                                         | 0.401        | 0.312        | 2271           |
| <b>0.3 % Eu</b>                                                                         | 0.435        | 0.295        | 1883           |
| <b>0.4 % Eu</b>                                                                         | 0.491        | 0.274        | 2291           |

different  $Eu^{3+}$  concentrations ( $0 < x < 4.0$ ) and  $Y_{0.94-x}Tb_{0.06}Eu_x$ - MOF material samples



**Table S8.** Comparison of the literature reported white light emitting MOF materials with the present White light emitting materials

| MOFs                                                                                                                                                                                                           | Excitation wavelength (nm) | CIE chromaticity (x, y) | CC T (K) | Quantum yield (%) | Reference     |
|----------------------------------------------------------------------------------------------------------------------------------------------------------------------------------------------------------------|----------------------------|-------------------------|----------|-------------------|---------------|
| [Dy(TETP)(NO <sub>3</sub> ) <sub>3</sub> ] $\cdot$ 4H <sub>2</sub> O                                                                                                                                           | 365                        | 0.33, 0.35              | -        | 58%               | <sup>10</sup> |
| [Zn <sub>3</sub> (TCPB) <sub>2</sub> (H <sub>2</sub> O) <sub>2</sub> ] $\cdot$ 2H <sub>2</sub> O $\cdot$ 4DMF<br>1.05% Eu and 1.56% Tb                                                                         | 254                        | 0.3292, 0.3543          | -        | -                 | <sup>11</sup> |
| NKU-114@9-AA                                                                                                                                                                                                   | 365                        | 0.34, 0.32              | 5101     | 42.07%            | <sup>12</sup> |
| Eu <sub>0.005</sub> Tb <sub>0.095</sub> -Bi <sub>0.9</sub> -MOF                                                                                                                                                | 325                        | 0.33, 0.31              | -        | -                 | <sup>13</sup> |
| Eu <sub>0.09</sub> Tb <sub>0.21</sub> @1                                                                                                                                                                       | 365                        | -                       | -        | 48.5%             | <sup>14</sup> |
| [Ir(ppy) <sub>2</sub> (bpy)] <sup>+</sup> @[(CH <sub>3</sub> ) <sub>2</sub> NH <sub>2</sub> ] <sub>15</sub> [(Cd <sub>2</sub> Cl) <sub>3</sub> (TATPT) <sub>4</sub> ] $\cdot$ 12DMF $\cdot$ 18H <sub>2</sub> O | 370                        | 0.31, 0.33              | 5409     | 84.5 %            | <sup>15</sup> |
| BGR MOF                                                                                                                                                                                                        | 360                        | 0.333, 0.336            | -        | -                 | <sup>16</sup> |
| Tb <sub>0.31179</sub> Eu <sub>0.1099</sub> Gd <sub>0.5782</sub> -SURMOF                                                                                                                                        | 360                        | 0.331, 0.329            | 5614     | -                 | <sup>17</sup> |
| ZJU-1:1.0%Tb <sup>3+</sup> ,2.0%Eu <sup>3+</sup>                                                                                                                                                               | 312                        | 0.32, 0.31              |          | 6.11              | <sup>18</sup> |
| [Eu(H <sub>2</sub> O) <sub>2</sub> (OH)(Hsfpip)] $\cdot$ H <sub>2</sub> O                                                                                                                                      | 380                        | 0.31, 0.35              |          | 16.5              | <sup>19</sup> |
| Y <sub>0.96</sub> Tb <sub>0.02</sub> Eu <sub>0.02</sub> (BPTA-bpy)                                                                                                                                             | 345                        | 0.334, 0.346            | 5432     | 28                | <sup>20</sup> |
| Y <sub>0.96</sub> Tb <sub>0.02</sub> Eu <sub>0.02</sub> (BPTA-bpy)                                                                                                                                             | 350                        | 0.33, 0.345             | 5604     | 31                | this work     |
| Y <sub>0.939</sub> Tb <sub>0.06</sub> Eu <sub>0.001</sub> (BPTA-phen)                                                                                                                                          | 350                        | 0.332, 0.331            | 5517     | 43                | this work     |

## LOD calculation

The luminescence intensity of the compound was plotted as a function of cation concentration.

The limit of detection (LOD) is given by:  $LOD = 3\sigma/m$ , where  $\sigma$  is the standard deviation of the blank measurements without adding the anion and  $m$  is the slope of the linear plot.

**Table S9.** Standard deviation and detection limit calculation for the azinphos-methyl pesticide and nitroaromatics sensing using the Tb and Eu MOFs.

| Blank readings of MOFs (without analyte) | Luminescence intensity | Standard deviation ( $\sigma$ ) | Slope from the graph (m)            | Detection limit ( $3\sigma/m$ )  | Limit of detection (LOD) (ppb) |
|------------------------------------------|------------------------|---------------------------------|-------------------------------------|----------------------------------|--------------------------------|
| <b>PESTICIDE SENSING</b>                 |                        |                                 |                                     |                                  |                                |
| <b>Tb phen-MOF</b>                       |                        |                                 |                                     |                                  |                                |
| Reading 1                                | 865249                 | 11.2                            | $1.008 \times 10^7 \text{ mM}^{-1}$ | $3.33 \times 10^{-6} \text{ mM}$ | 1.06                           |
| Reading 2                                | 865263                 |                                 |                                     |                                  |                                |
| Reading 3                                | 865251                 |                                 |                                     |                                  |                                |
| Reading 4                                | 865239                 |                                 |                                     |                                  |                                |
| Reading 5                                | 865271                 |                                 |                                     |                                  |                                |
| <b>Eu-phen-MOF</b>                       |                        |                                 |                                     |                                  |                                |
| Reading 1                                | 260676                 | 20.84                           | $4.07 \times 10^6 \text{ mM}^{-1}$  | $1.53 \times 10^{-5} \text{ mM}$ | 4.93                           |
| Reading 2                                | 260678                 |                                 |                                     |                                  |                                |
| Reading 3                                | 260698                 |                                 |                                     |                                  |                                |
| Reading 4                                | 260743                 |                                 |                                     |                                  |                                |
| Reading 5                                | 260640                 |                                 |                                     |                                  |                                |
| <b>NITROAROMATICS SENSING</b>            |                        |                                 |                                     |                                  |                                |
| <b>Tb bpy-MOF</b>                        |                        |                                 |                                     |                                  |                                |
| Reading 1                                | 522106                 | 24.61                           | $1.75 \times 10^7 \text{ mM}^{-1}$  | $4.21 \times 10^{-6} \text{ mM}$ | 0.97                           |
| Reading 2                                | 522171                 |                                 |                                     |                                  |                                |
| Reading 3                                | 522116                 |                                 |                                     |                                  |                                |
| Reading 4                                | 522128                 |                                 |                                     |                                  |                                |
| Reading 5                                | 522157                 |                                 |                                     |                                  |                                |
| <b>Eu bpy-MOF</b>                        |                        |                                 |                                     |                                  |                                |
| Reading 1                                | 526117                 | 27.89                           | $1.53 \times 10^7$                  | $5.46 \times 10^{-6}$            | 1.23                           |
| Reading 2                                | 526112                 |                                 |                                     |                                  |                                |
| Reading 3                                | 526137                 |                                 |                                     |                                  |                                |
| Reading 4                                | 526157                 |                                 |                                     |                                  |                                |
| Reading 5                                | 526188                 |                                 |                                     |                                  |                                |

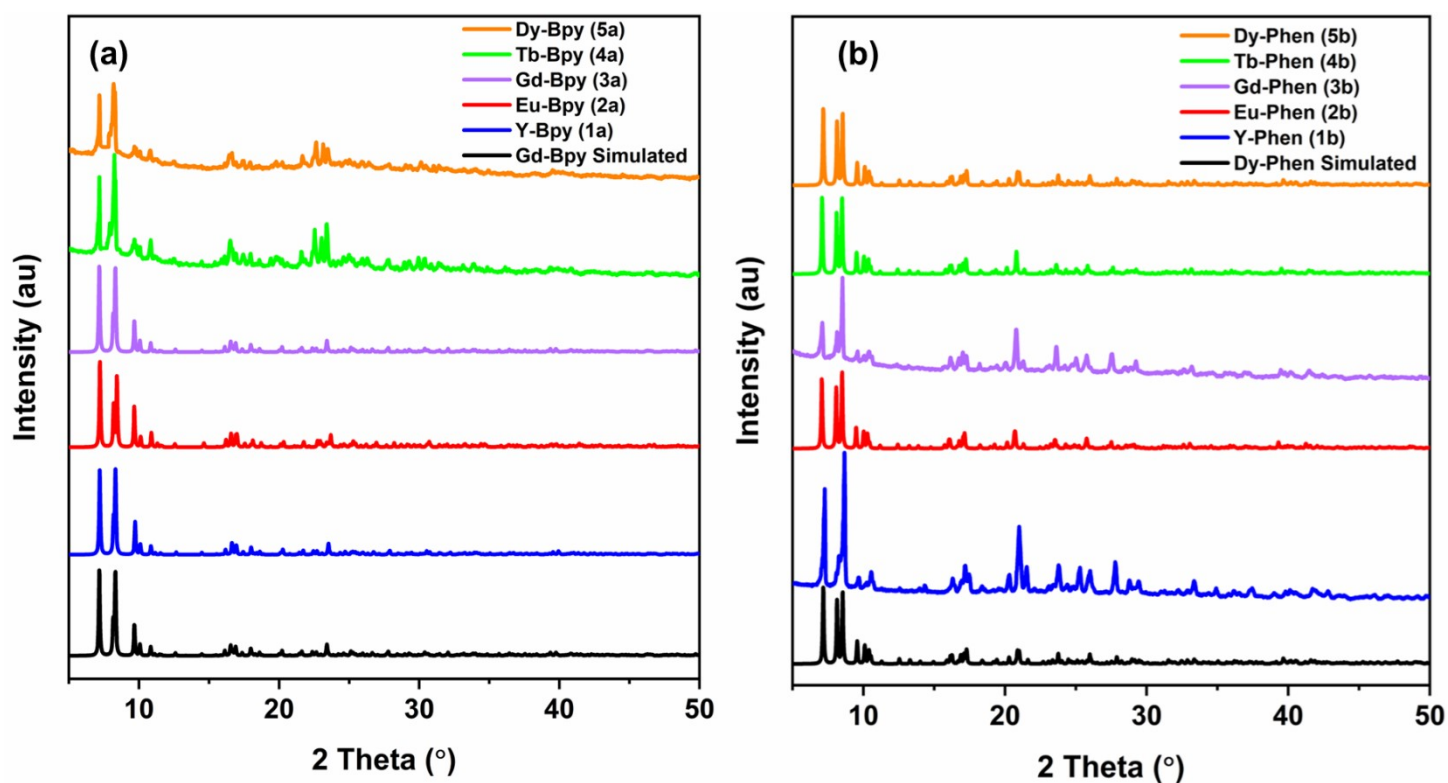

**Figure S1.** Experimental and simulated PXRD patterns of (a) 3a compound and (b) 5b compound. Note the experimental PXRD pattern of other compounds exactly matches with the simulated pattern of **3a** and **5b**.

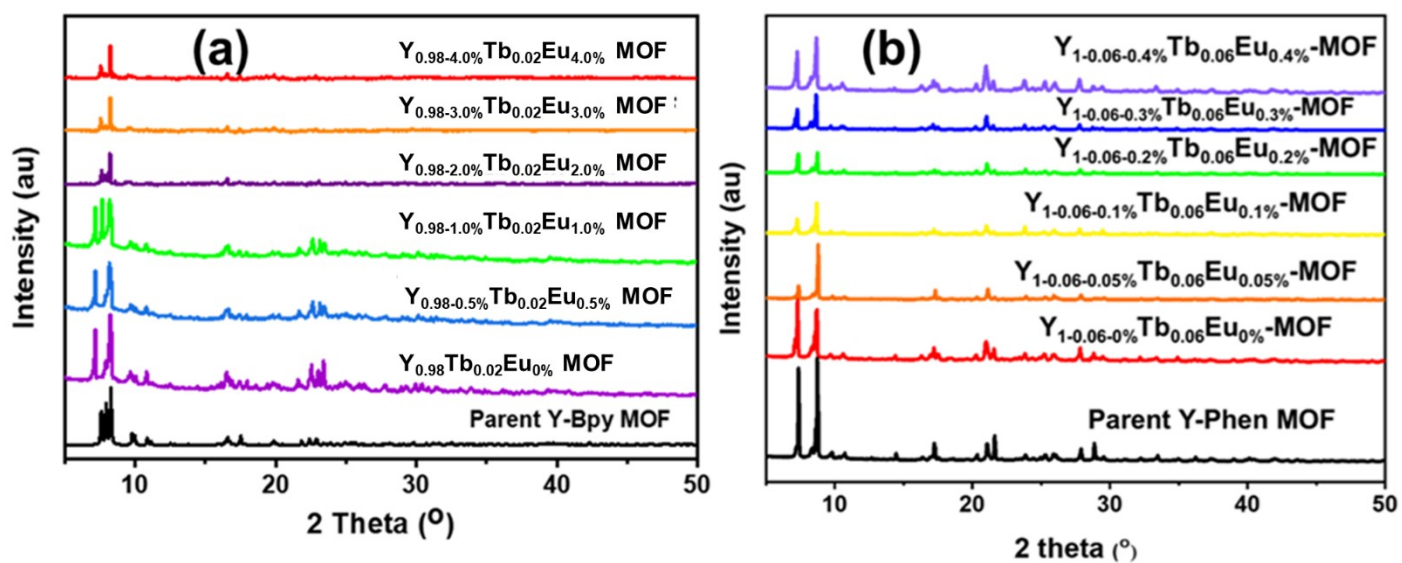

**Figure S2.** PXRD patterns of (a)  $Y_{0.98-x\%}Tb_{0.02}Eu_{x\%}$ -MOF samples (bpy series) and (b)  $Y_{0.94-x\%}Tb_{0.06}Eu_{x\%}$ -MOF samples (phen series), confirming the structural integrity



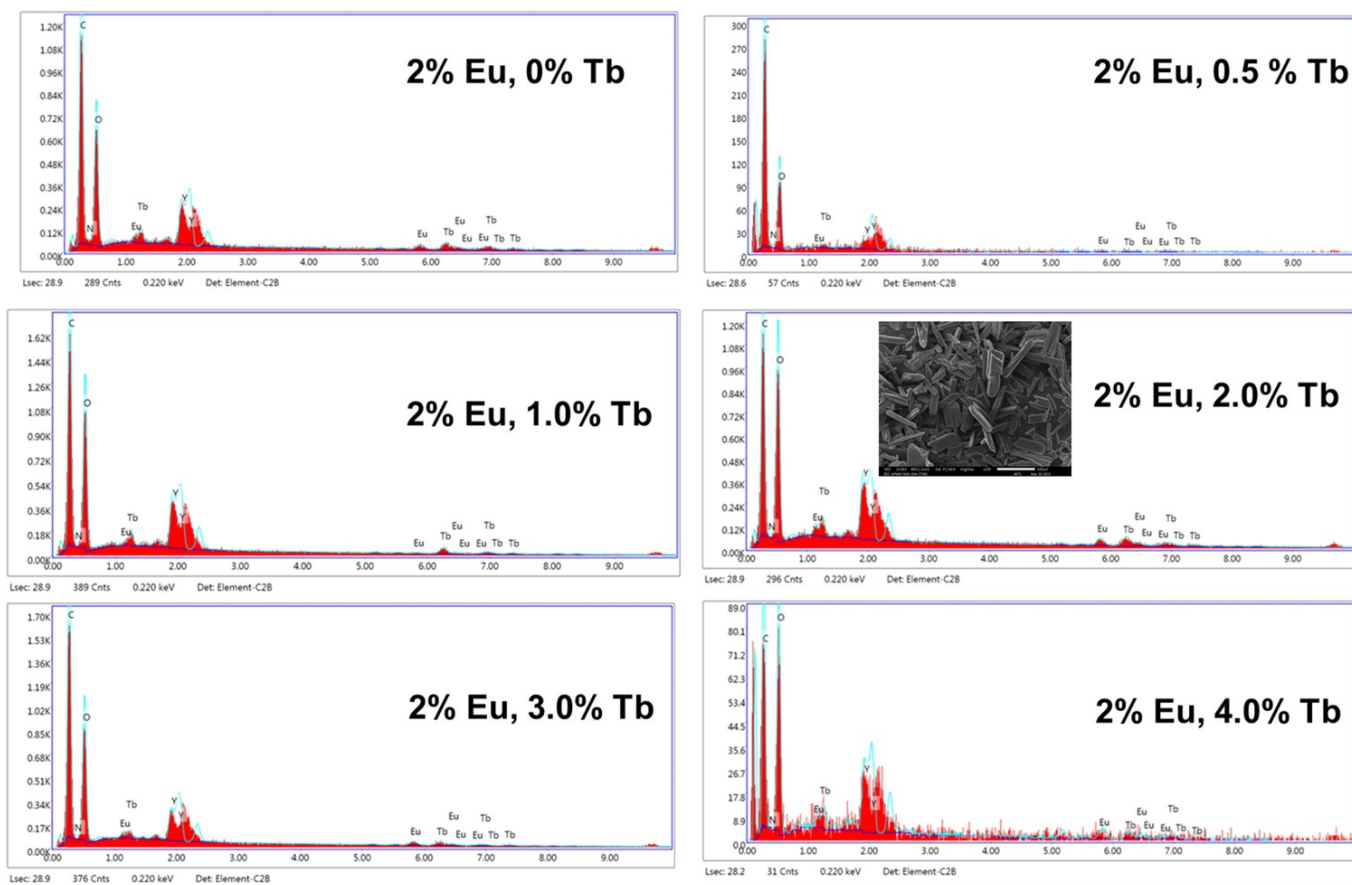

**Figure S3.** EDX mapping of all doped Y – bipyridine MOFs ( $Y_{1-0.02-x}Tb_{0.02}Eu_x$  ( $x = 0.0, 0.5, 1.0, 2.0, 3.0, 4.0 \%$ )) samples , SEM image of 2%Tb, 2% Eu, Y- bipyridine MOF

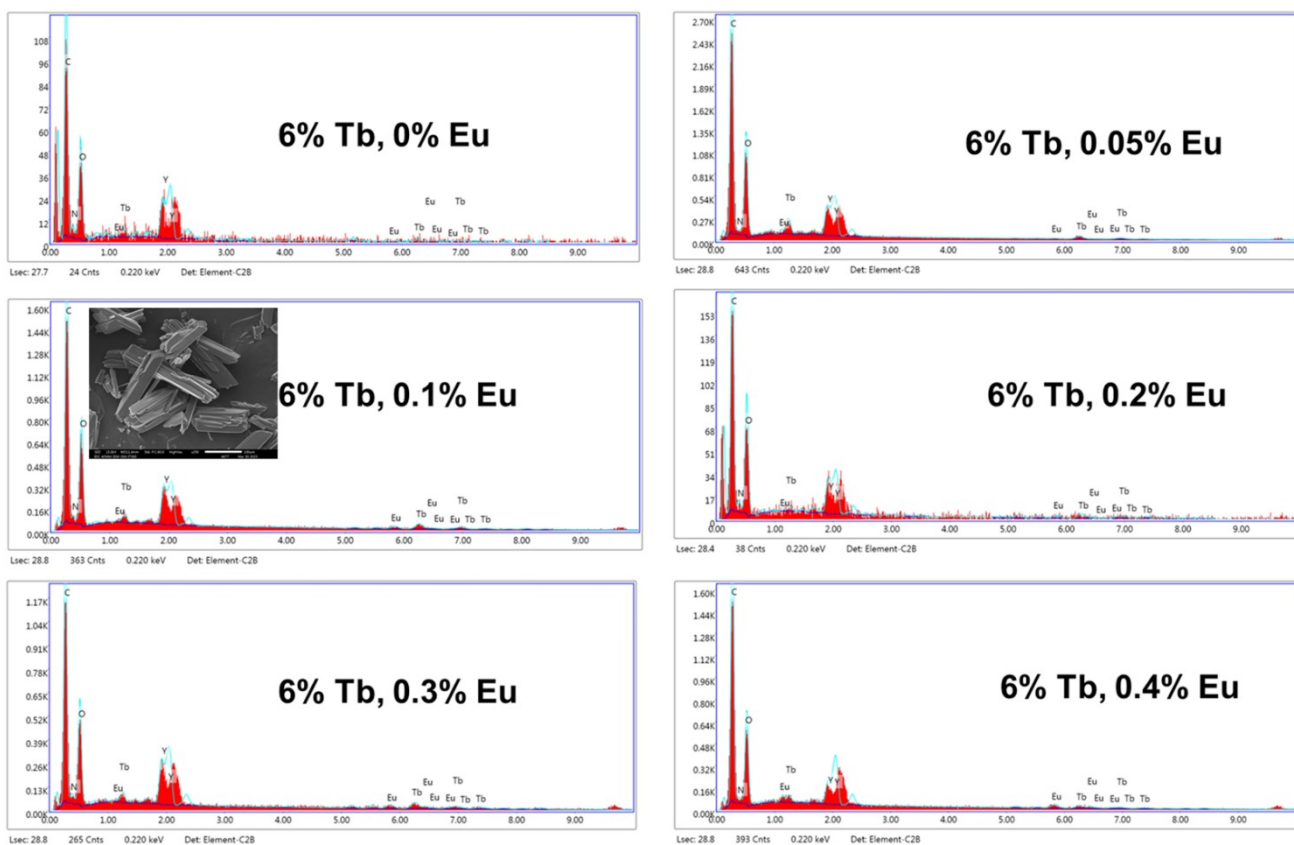

**Figure S4.** EDX mapping of all doped Y – bipyridine MOFs ( $Y_{1-0.06-x}Tb_{0.06}Eu_x$  ( $x = 0.0, 0.05, 0.1, 0.2, 0.3, 0.4$  %)) samples, SEM image of 6%Tb, 0.1% Eu, Y- 1, 10 phenanthroline MOF

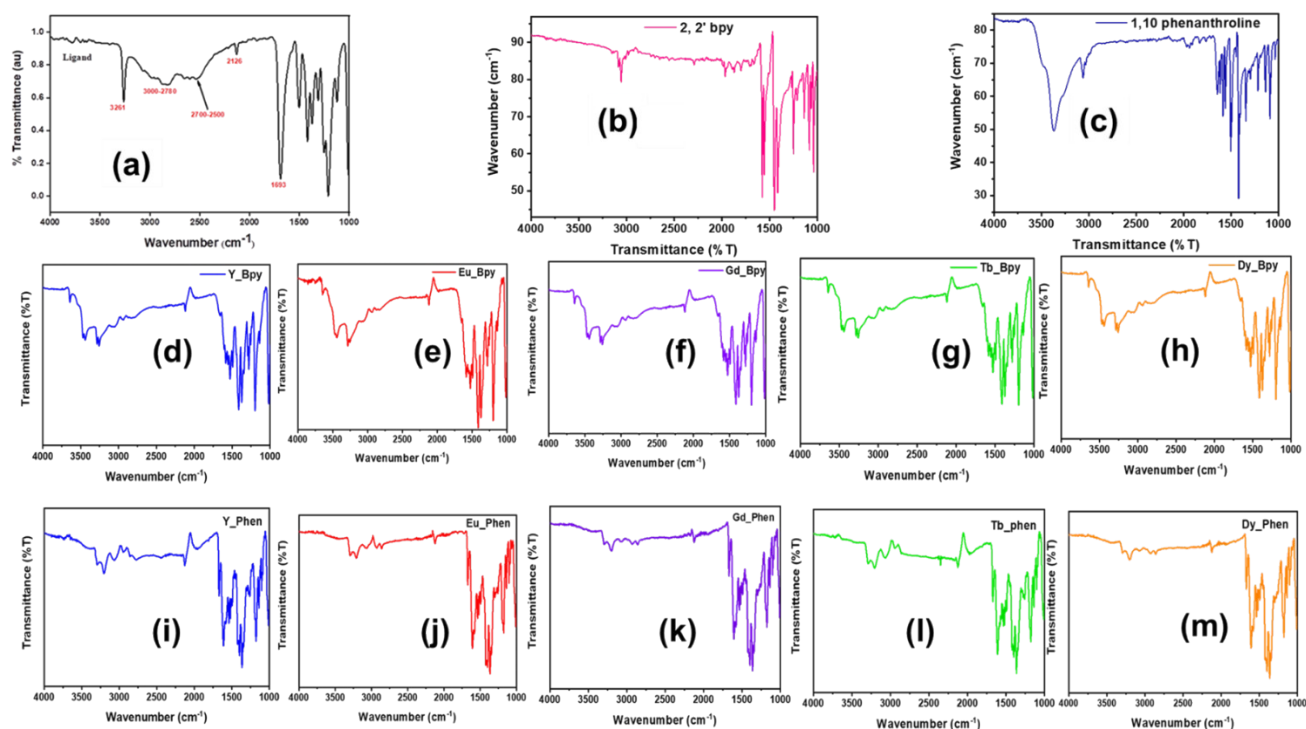

**Figure S5.** Infrared spectra of ligand (2, 5 BPTA) (a), 2, 2' - bipyridine (b), 1, 10 – phenanthroline (c) Compounds **1a-5a** (d-h) and Compounds **1b-5b** (i-m).

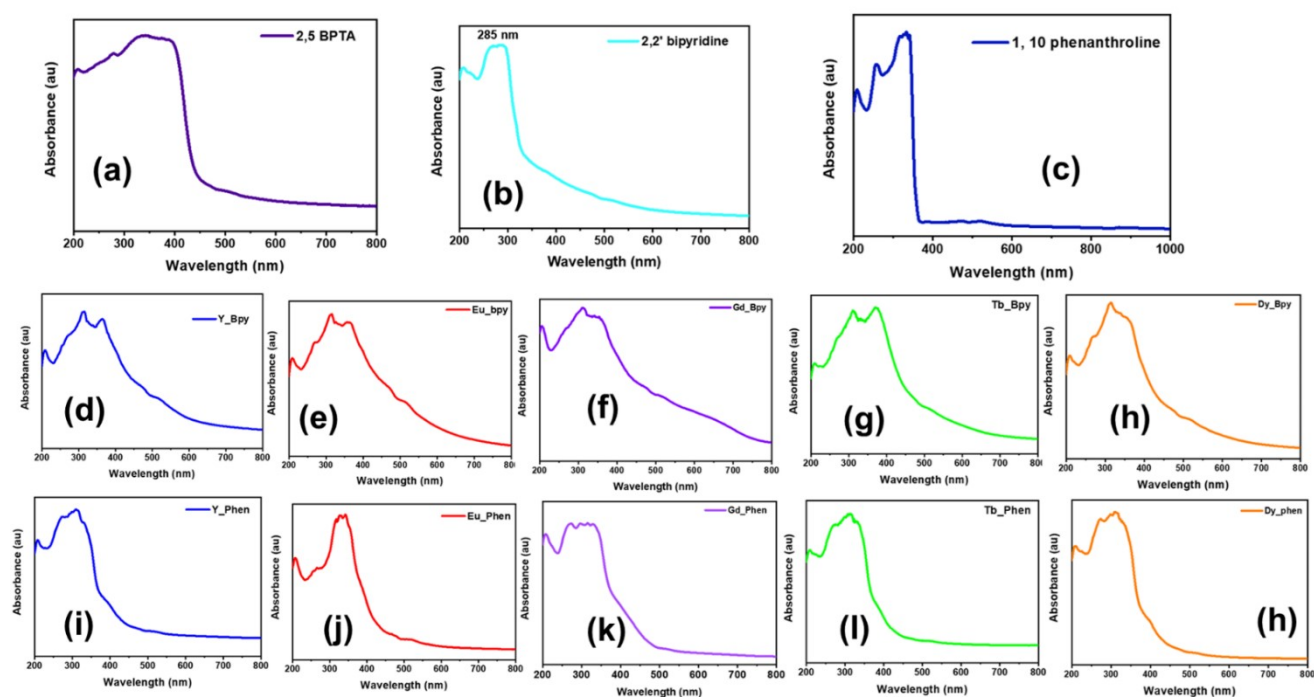

**Figure S6.** The solid-state UV–Vis absorption spectrum of compound **1-5** (a,b).

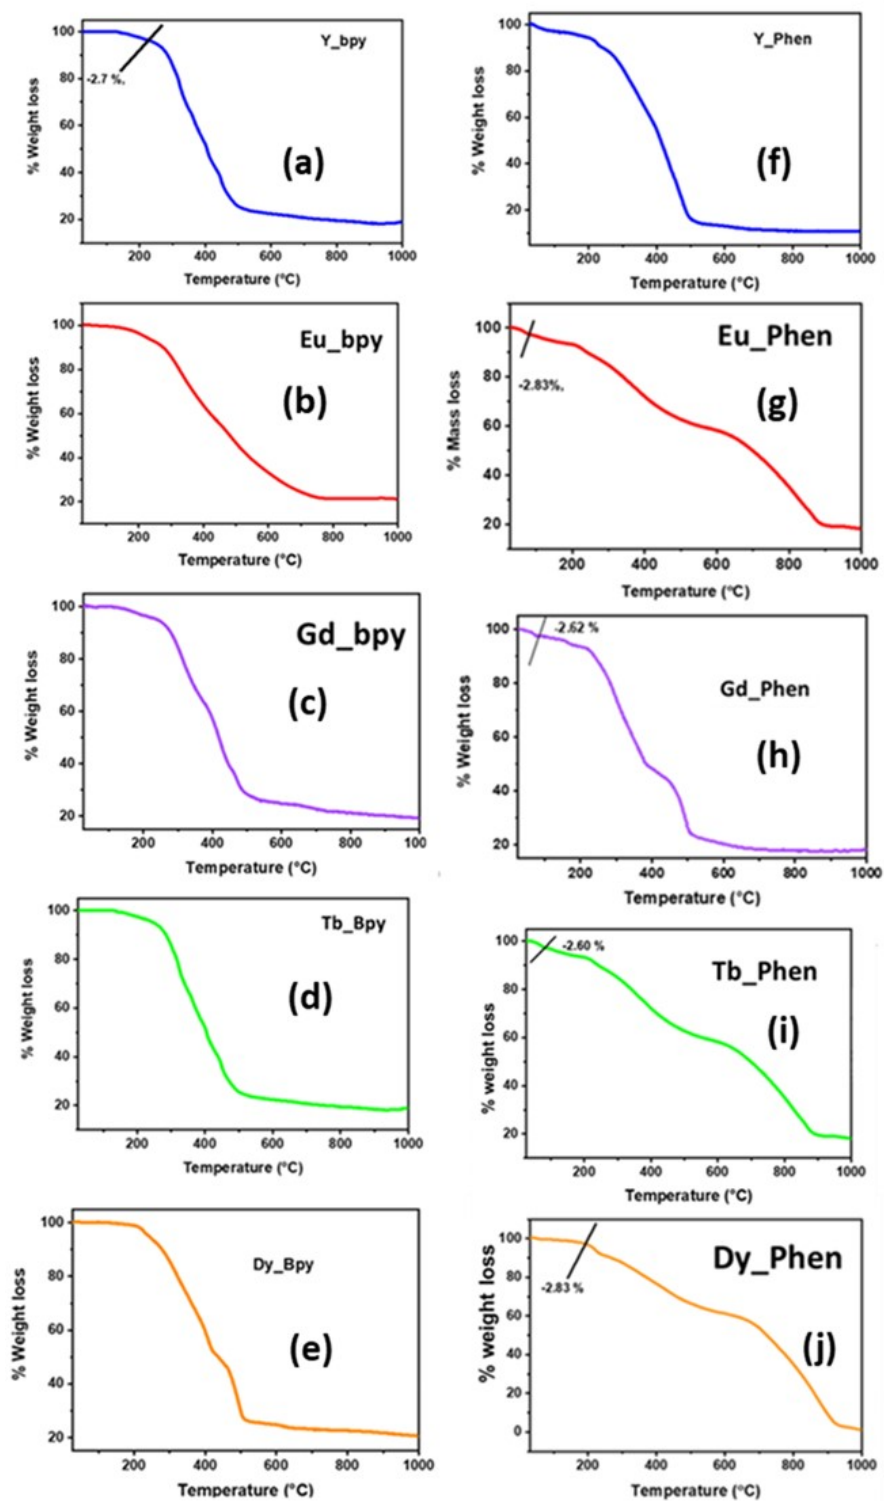

**Figure S7.** Thermogravimetric analysis curve (TGA) curve of compounds **1a-5a** (a-e) and compounds **1b-5b** (f-j).

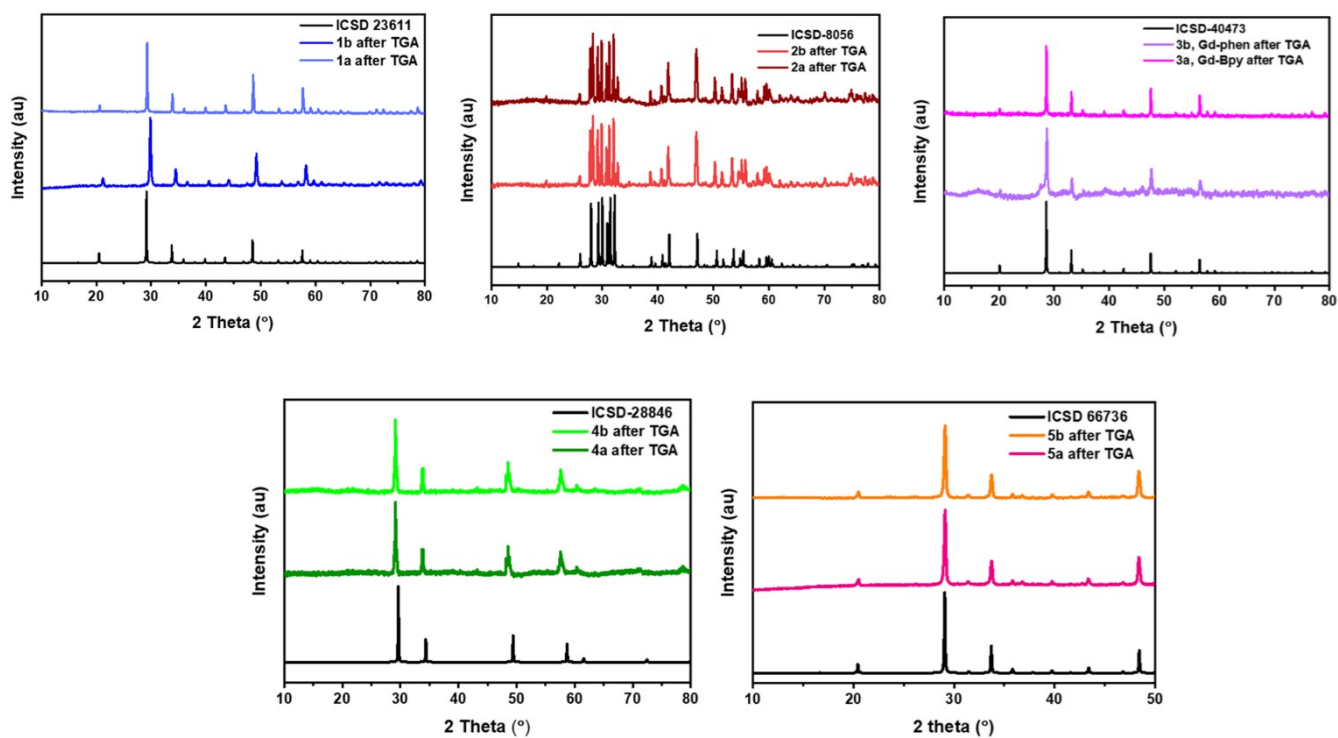

**Figure S8.** PXRD analysis after thermogravimetric analysis curve (TGA) curve of Compounds 1-5 (a, b).

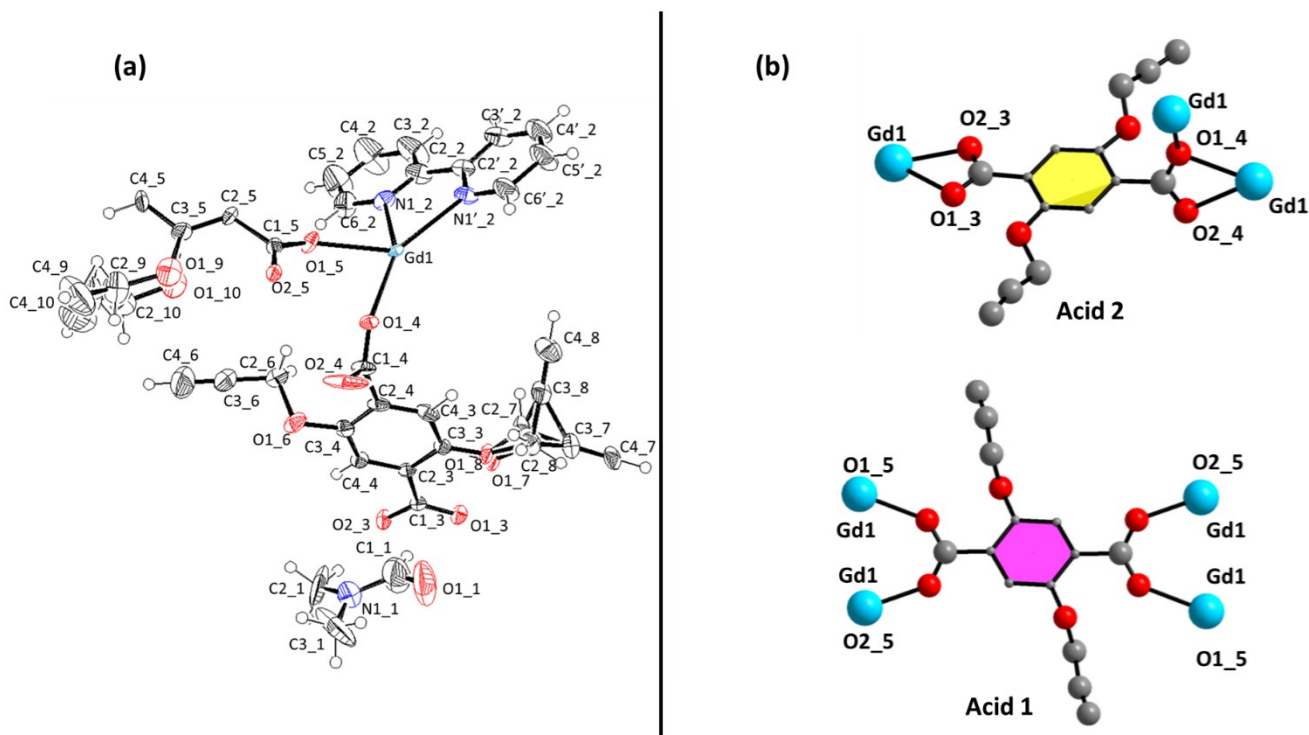

**Figure S9.** (a) Asymmetric unit of **3a** (Gd-bipyridine compound) (Thermal ellipsoid with 50% probability); (b) The various coordination modes of the 2, 5 BPTA anions in Gd MOF, acid 1 and acid 2

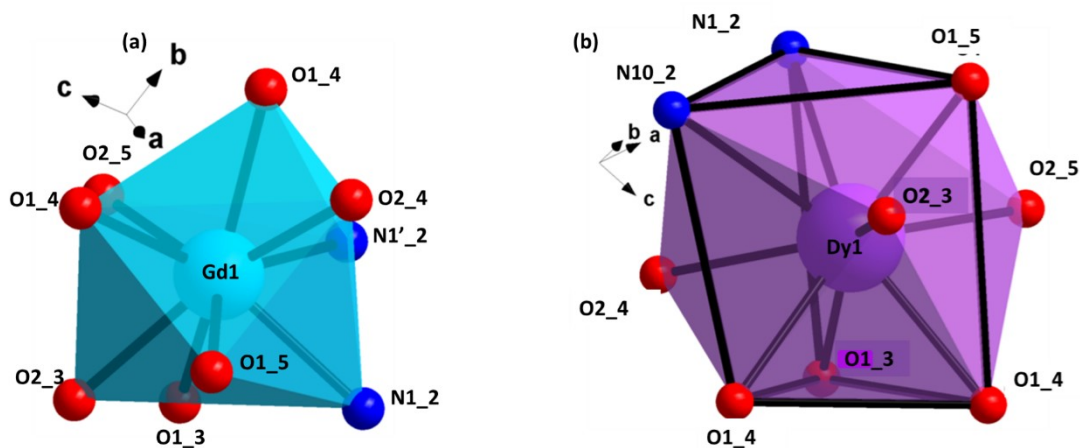

**Figure S10.** Metal coordination of (a) Gd bpy (**3a**) MOF,  $[\text{Gd}(\text{BPTA})_{1.5}(\text{Bpy})] \cdot 0.5\text{DMF}$  capped square antiprismatic geometry and (b) Dy phenanthroline (**5b**) MOF,  $[\text{Dy}(\text{BPTA})_{1.5}(\text{Phen})] \cdot 0.5\text{DMF}$  tricapped trigonal prismatic geometry.

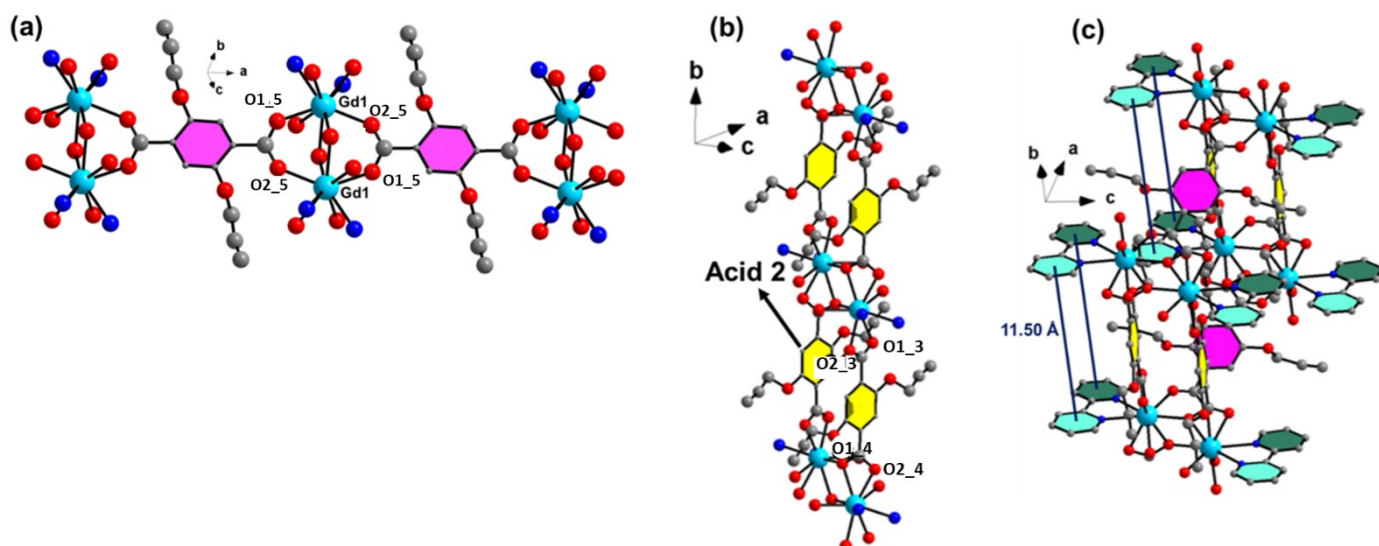

**Figure S11.** (a) 1D chain formation by acid – 1 (b) 1D chain formation by acid 2 (c) distance between the bipyridine units in a single layer (d) The lattice water molecule interactions with layers.

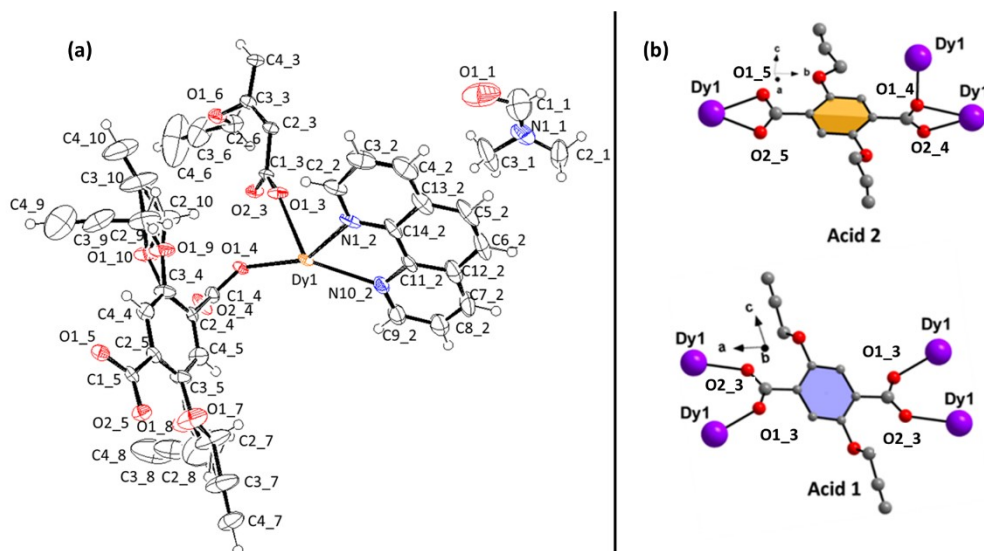

**Figure S12.** (a) Asymmetric unit of **5b** (Dy-phen compound) (Thermal ellipsoid with 50% probability); (b) The various coordination modes of the 2, 5 BPTA anions in Dy MOF, acid 1 and acid 2

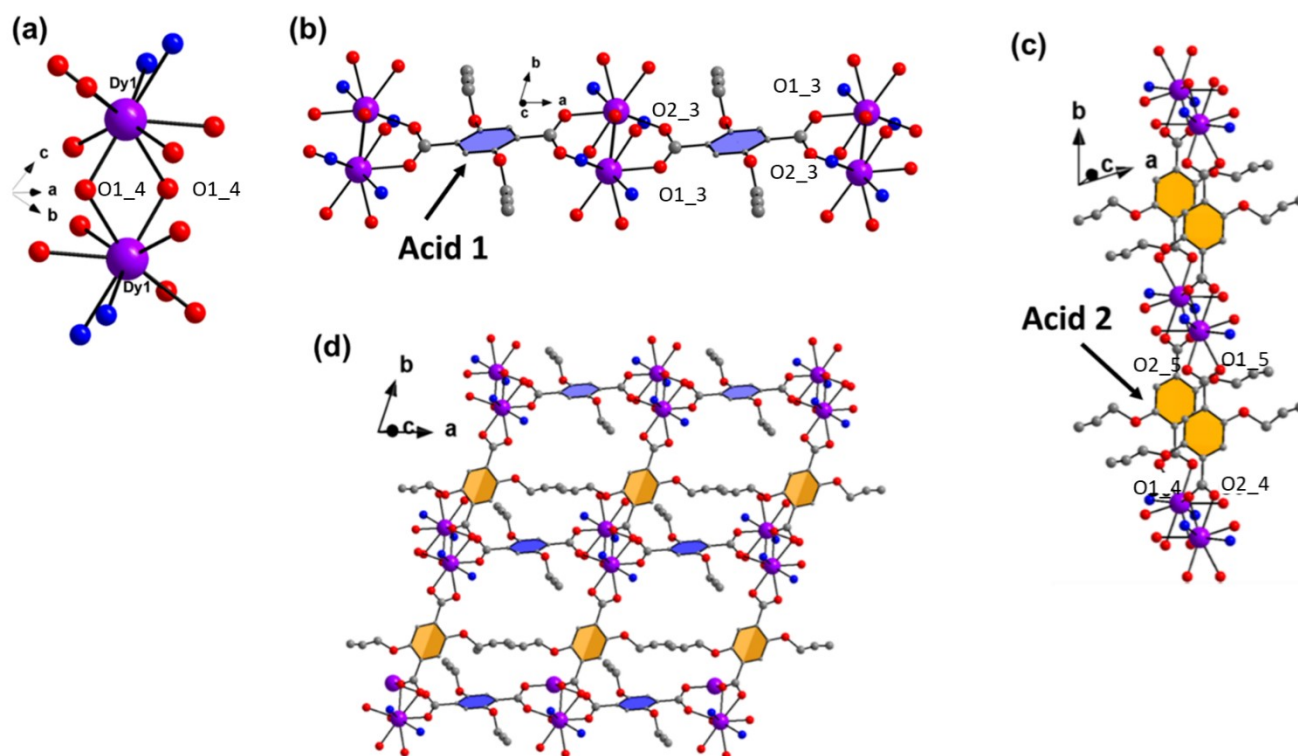

**Figure S13.** (a) Dimeric unit formed by O6 atom (b) 1D chain propagation by the Acid 1-unit (c) 1D chain propagation by Acid 2 (d) 2D layer formation in **5b**; phenanthroline containing MOF

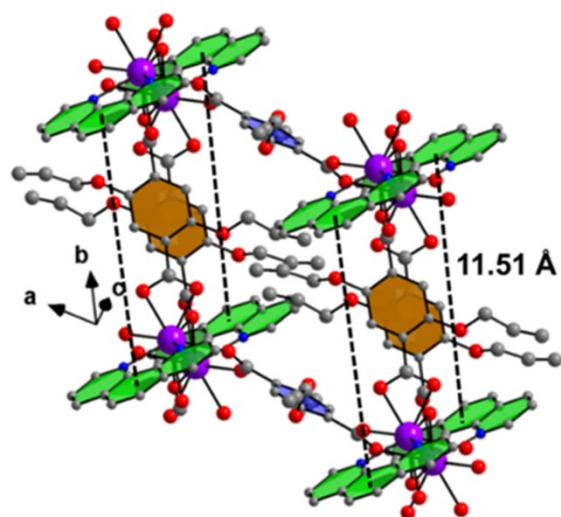

**Figure S14.** Distance between 1, 10 phenanthrolines in a single layer



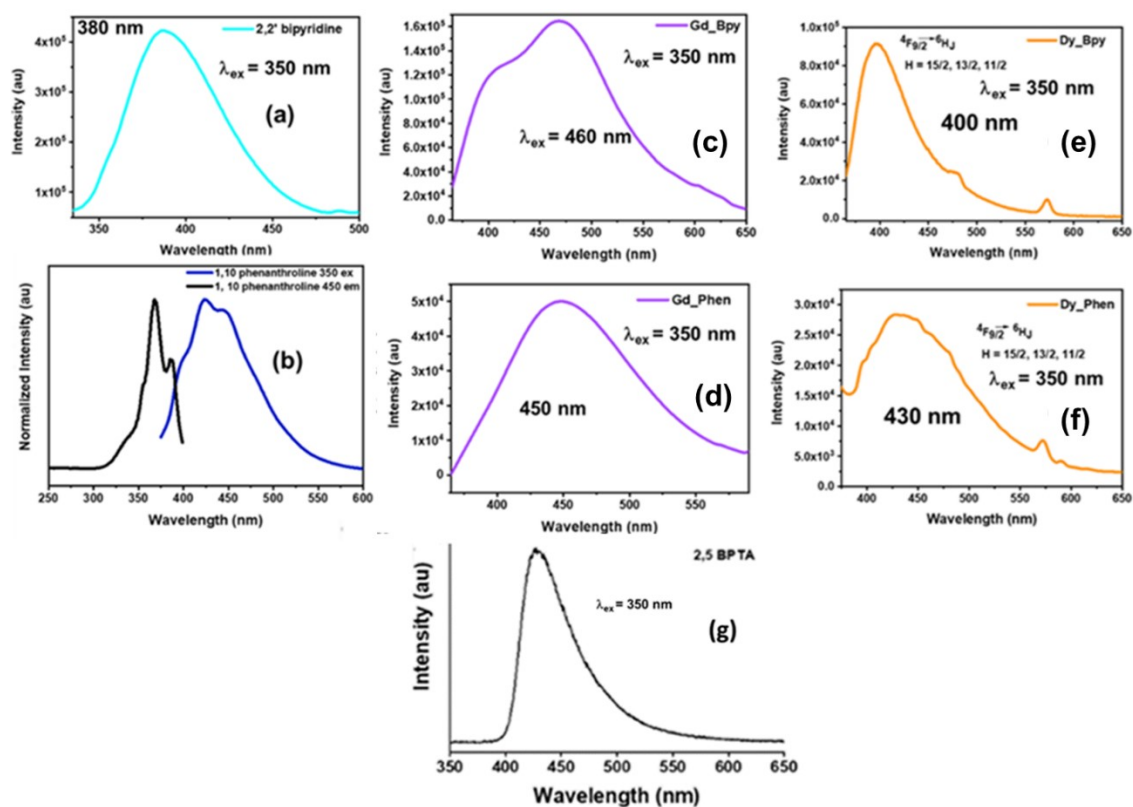

**Figure S15.** Room-temperature photoluminescence spectra for 2, 2' bipyridine, 1, 10 phenanthroline, compound **3a** (c), **3b** (d), **5a** (e), **5b** (f) and the ligand (g)

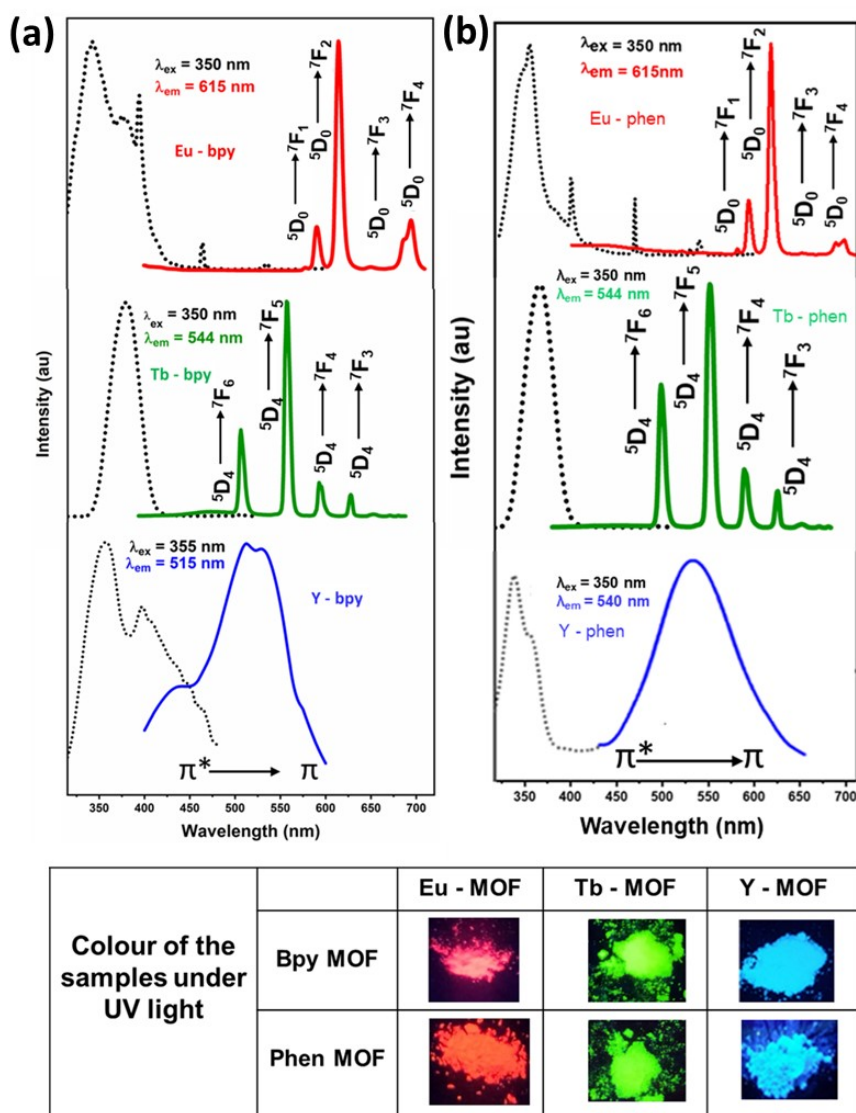

**Figure S16.** Excitation (black dotted) and emission spectra of Eu-MOF, Tb-MOF, Y-MOF in the solid-state Inset: Photograph showing the luminescence colour of the MOFs under long UV lamp. Note the characteristic red, green and blue colour for  $\text{Eu}^{3+}$ ,  $\text{Tb}^{3+}$  and the Y containing compound, (a) 2, 2' Bipyridine containing compounds (b) 1, 10 phenanthroline containing compounds.

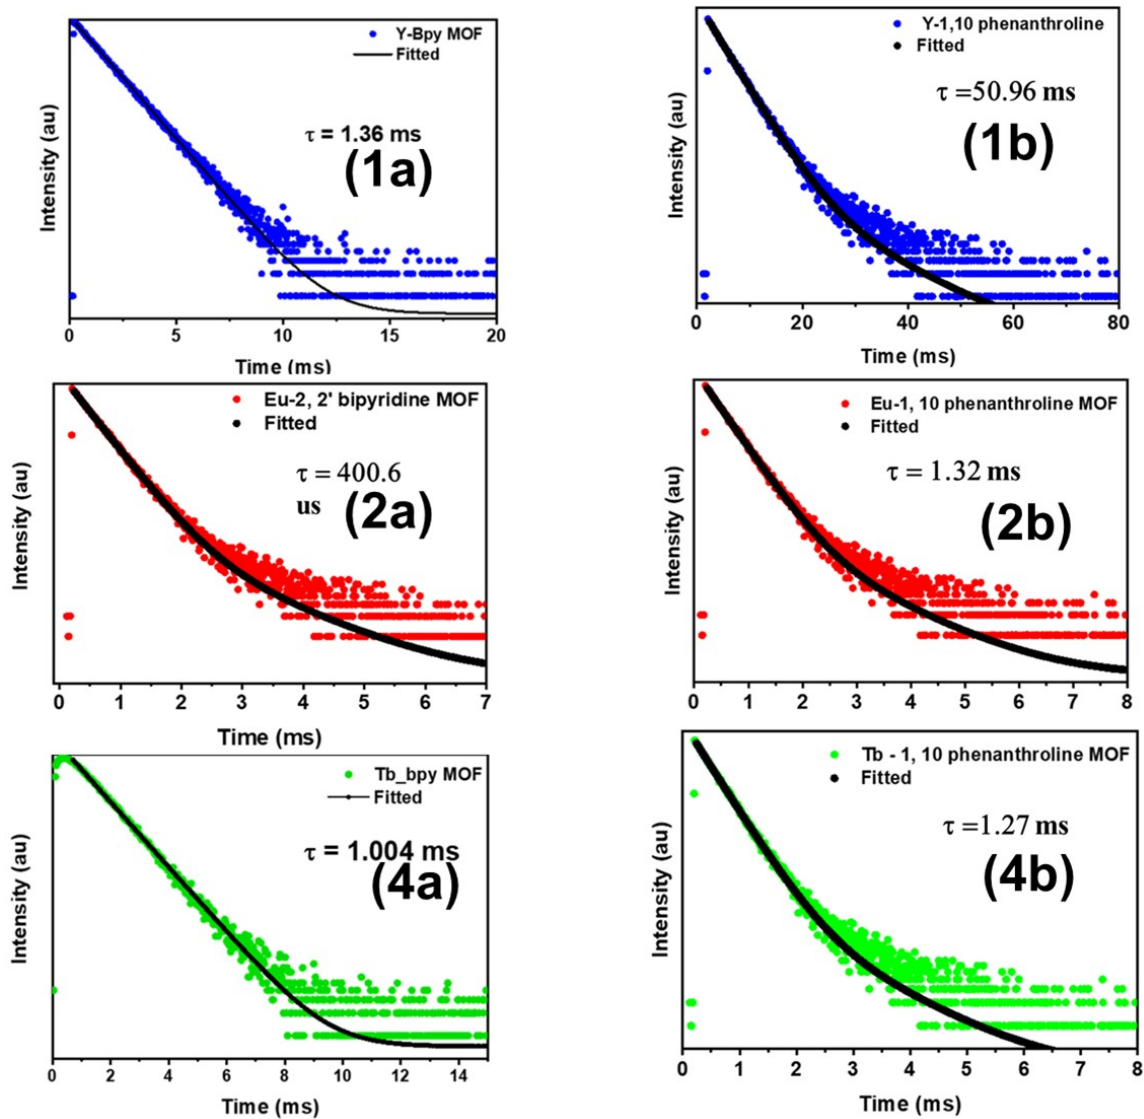

**Figure S17.** Luminescence decay profiles (298K) for Y, Eu and Tb MOFs.

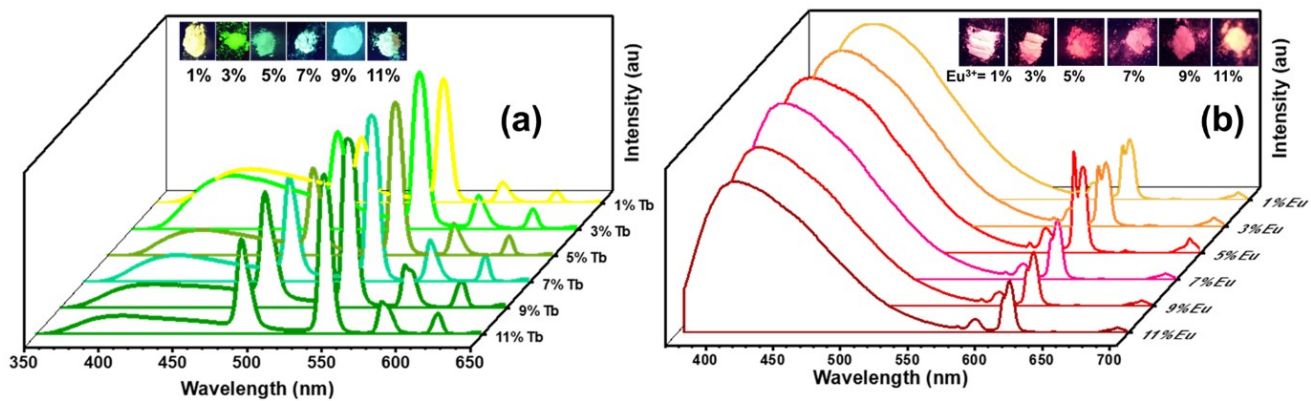

**Figure S18.** Different substitution of Tb<sup>3+</sup> (a) and Eu<sup>3+</sup> (b) in Y- bpy MOF

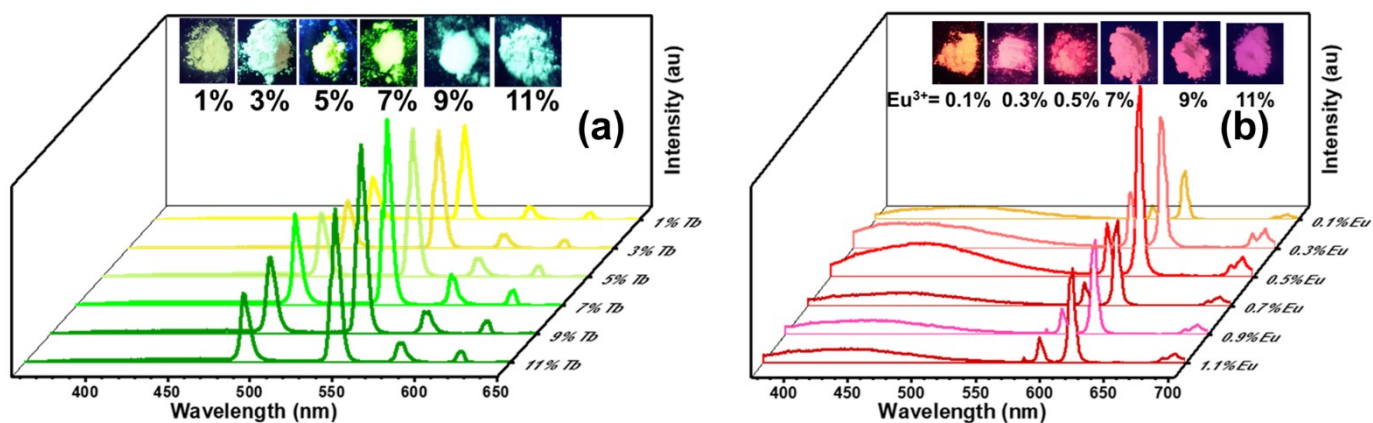

**Figure S19.** Different substitution of Tb<sup>3+</sup> (a) and Eu<sup>3+</sup> (b) in Y- phen MOF

$Y_{1-0.02-x\%}Tb_{0.02}Eu_{x\%}-MOF$ ,  $x = 0.0, 0.50, 1.0, 2.0, 3.0, 4.0$

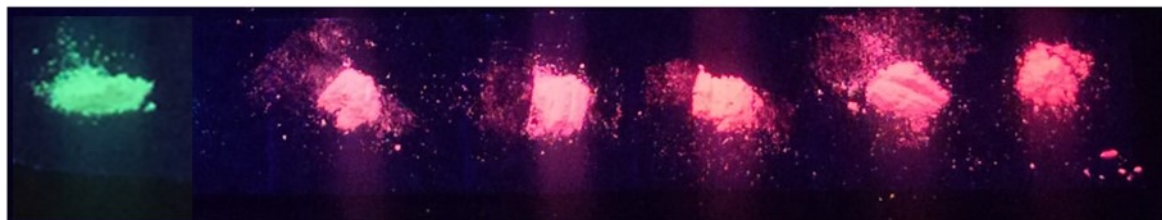

$Y_{1-0.02-x\%}Tb_{0.02}Eu_{x\%}-MOF$ ,  $x = 0.0, 0.05, 0.10, 0.20, 0.30, 0.40$

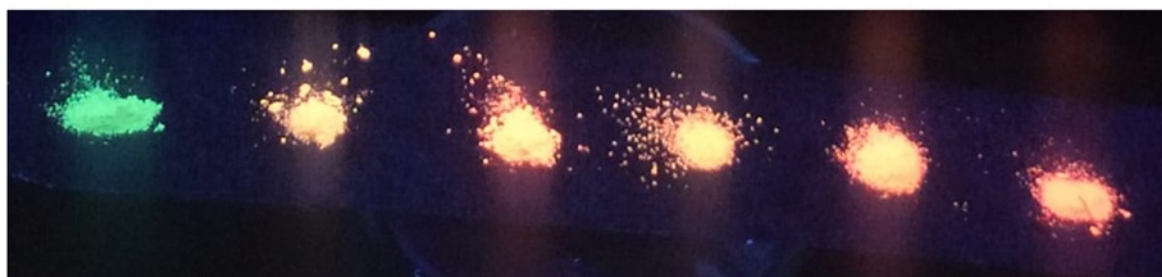

**Figure S20.** Colour of the  $Y_{1-0.02-x\%}Tb_{0.02}Eu_{x\%}-MOF$  ( $x = 0.0, 0.5, 1, 2, 3, 4$ ) and  $Y_{1-0.02-x\%}Tb_{0.02}Eu_{x\%}-MOF$  ( $x = 0.0, 0.05, 0.1, 0.2, 0.3, 0.4$ ) samples under UV light

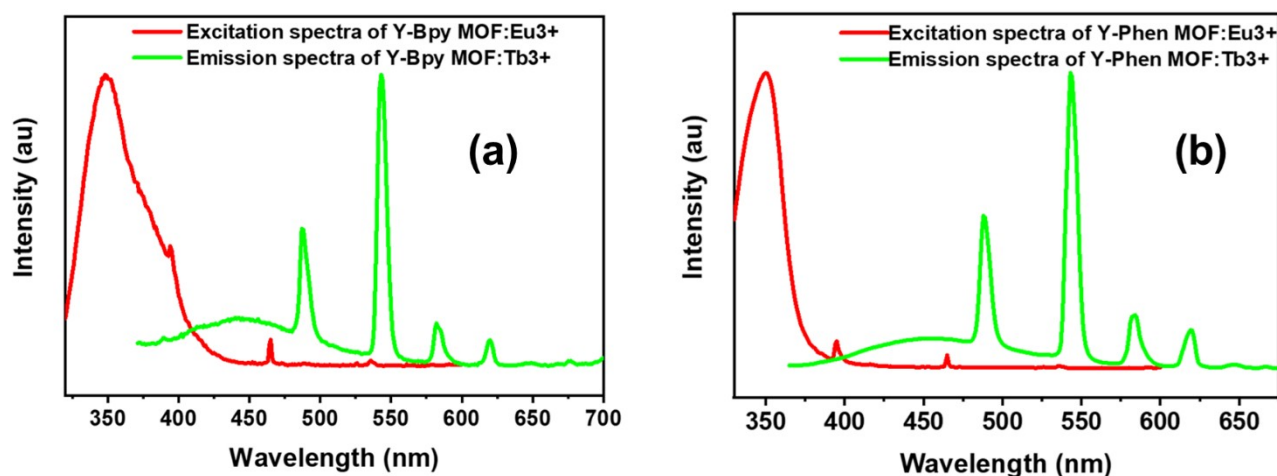

**Figure S21.** The spectral overlap between the PLE spectrum of Y-MOF:  $Eu^{3+}$  and PL spectrum of Y-MOF:  $Tb^{3+}$  materials (a) Y-bipyridine MOFs (b) Y-phenanthroline MOFs.

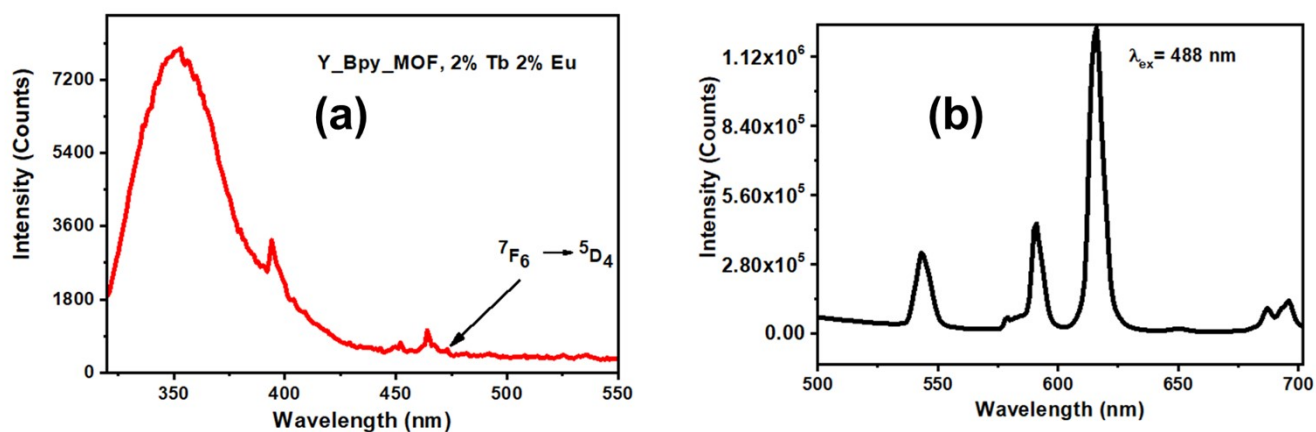

**Figure S22.** (a) The excitation spectrum of Y-MOF bipyridine, 2% Tb<sup>3+</sup>, 2% Eu<sup>3+</sup> sample monitored at 616 nm; (b) The emission spectrum of the sample at the excitation of 488nm.

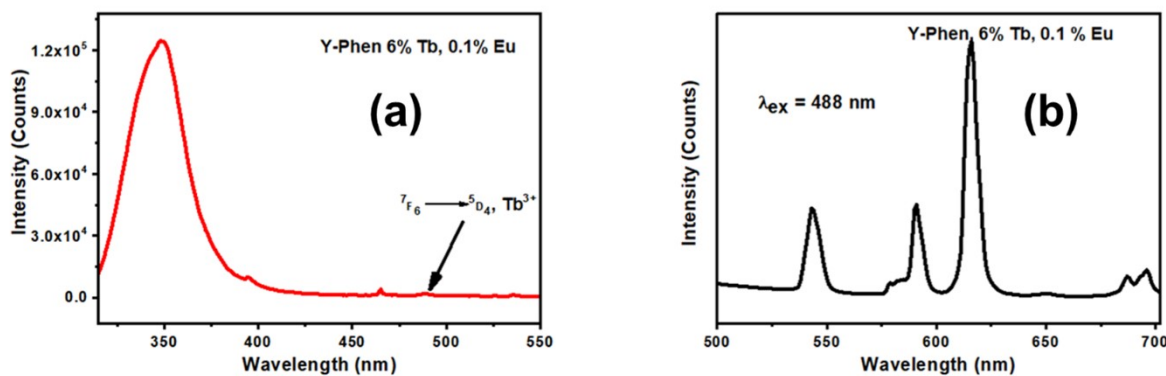

**Figure S23.** (a) The excitation spectrum of Y-MOF phenanthroline, 6% Tb<sup>3+</sup>, 0.1% Eu<sup>3+</sup> sample monitored at 616 nm; (b) The emission spectrum of the sample at the excitation of 488 nm.

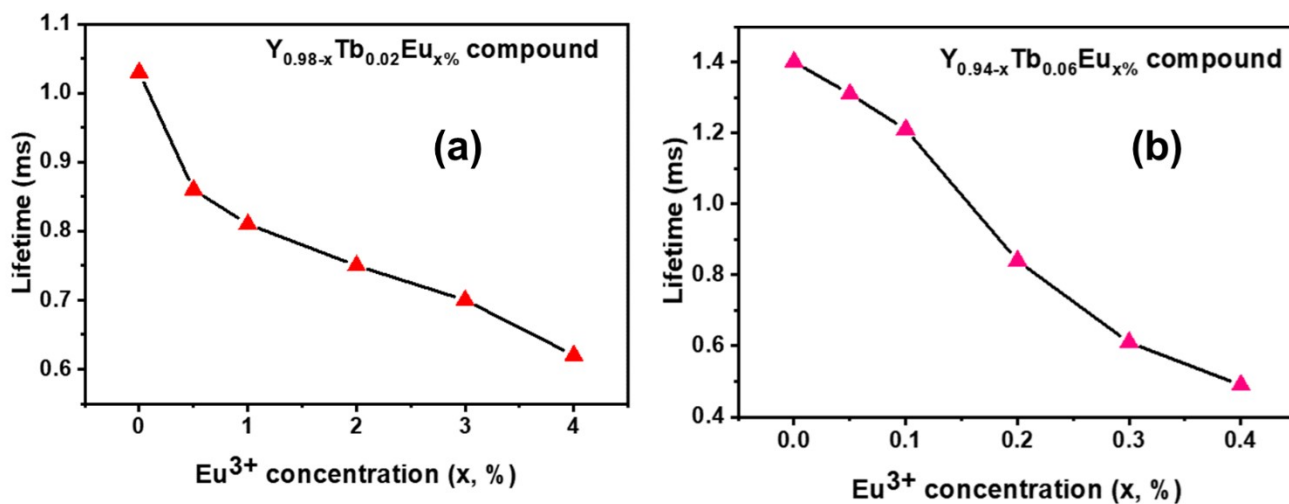

**Figure S24.** Lifetime vs concentration of the Eu<sup>3+</sup> plot (a) Y<sub>0.98-x</sub>Tb<sub>0.02</sub>Eu<sub>x</sub> and (b) Y<sub>0.94-x</sub>Tb<sub>0.06</sub>Eu<sub>x</sub> compounds.

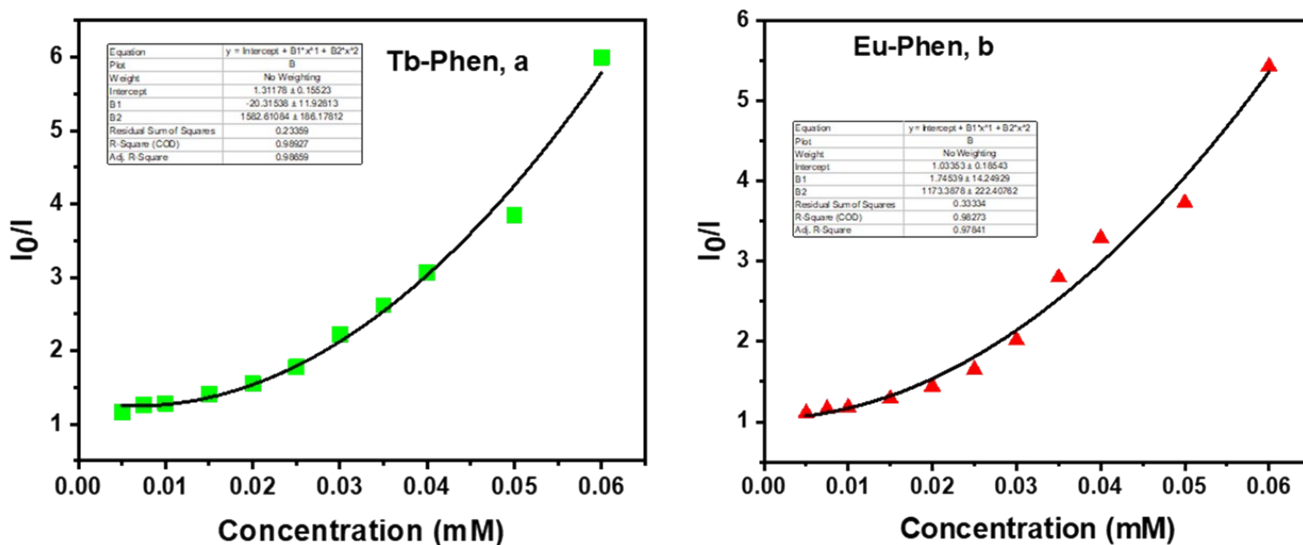

**Figure. S25.** Stern-Volmer plots for (a) Tb and (b) Eu – phen MOF at high concentration of azinphos-methyl sensing

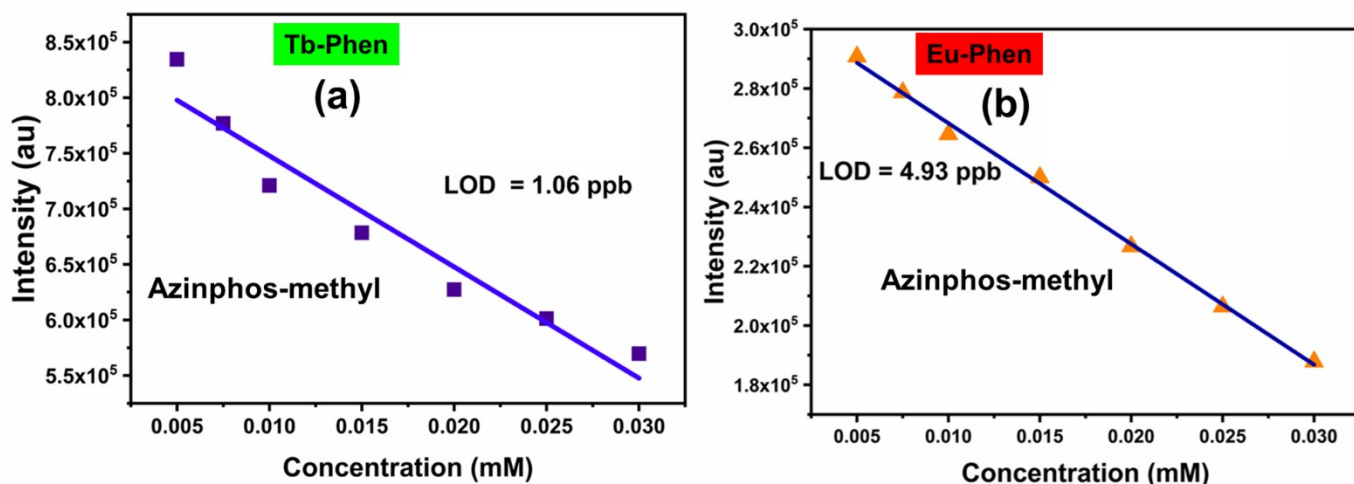

**Figure 26.** The LOD calculation graph for the pesticide sensing in Tb-phen and Eu-phen

MOFs

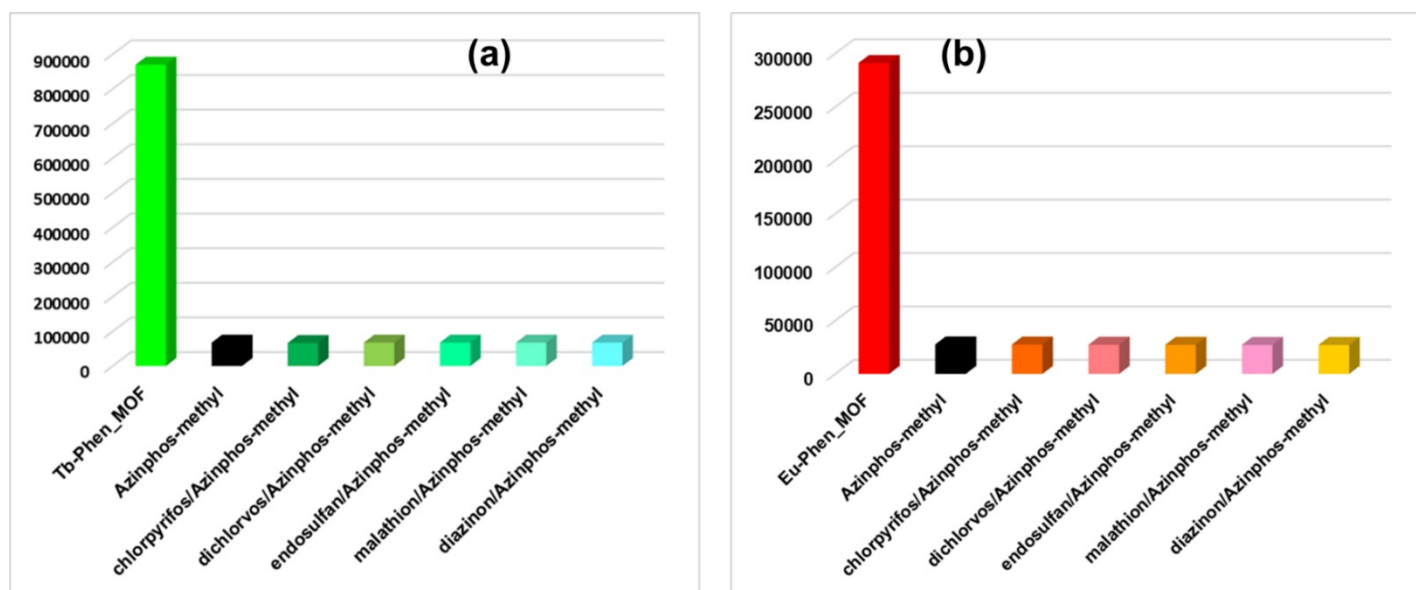

**Figure S27.** Comparison of the luminescence quenching effect of Azinphos methyl in the presence of other pesticides (75  $\mu$ M) using **(a)** Tb-phen MOF and **(b)** Eu-phen MOF.



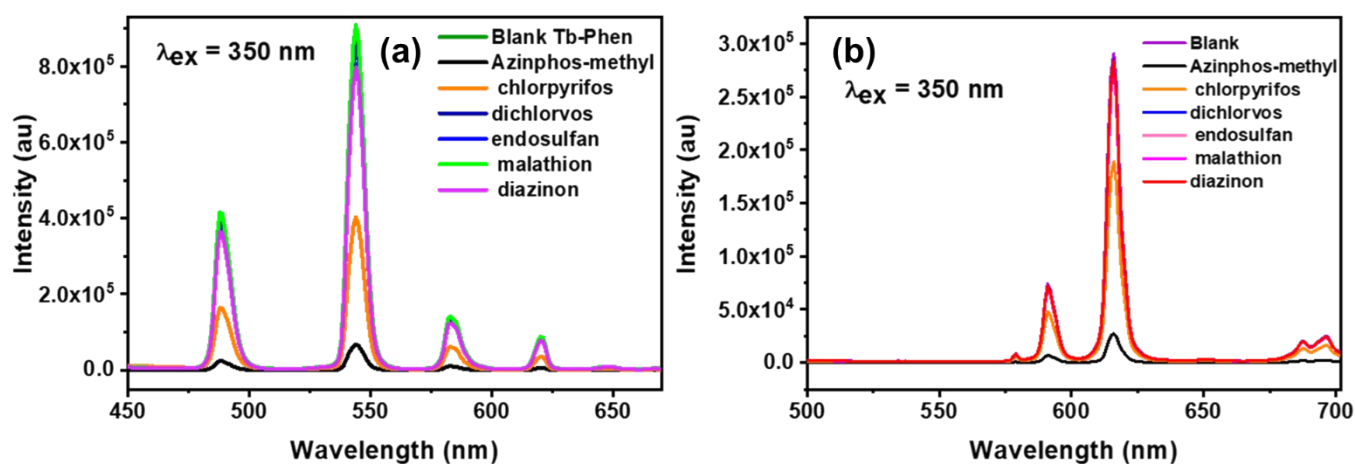

**Figure S28.** (a) Emission spectra of Tb-phen compound (b) Emission spectra of Eu-phen compound dispersed in water upon addition of acetonitrile solution of different pesticide solutions Azinphos-methyl, Chlorpyrifos, Dichlorvos, Endosulfan, Malathion, Diazinon ( $\lambda_{\text{ex}} = 350 \text{ nm}$ ). Concentration of pesticides are  $75 \mu\text{M}$  in the medium

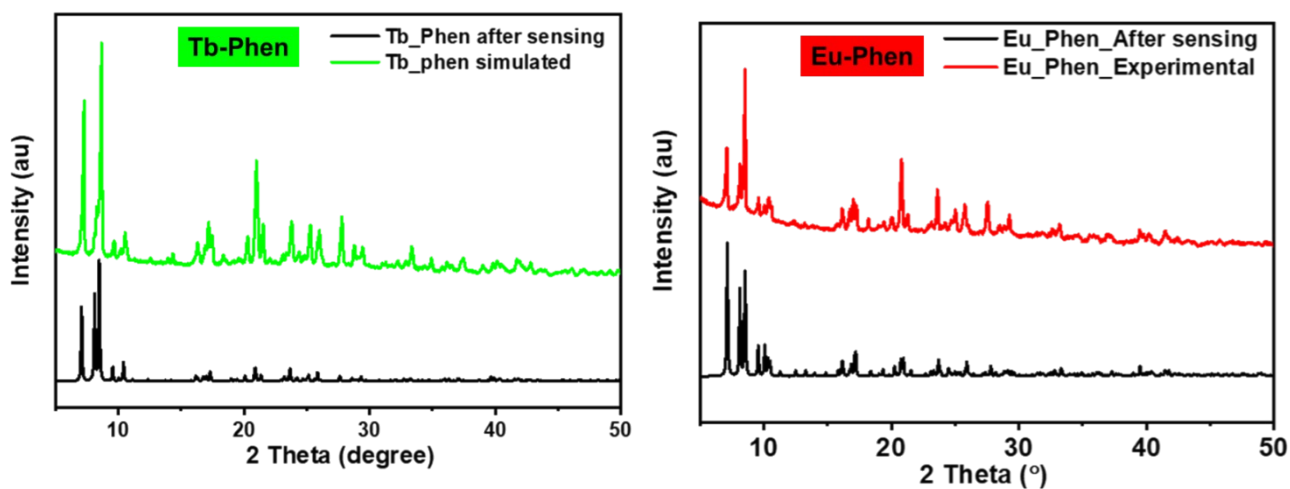

**Figure S29.** The PXRD study was carried out after the pesticide sensing studies, which indicated the structural integrity of MOF compounds

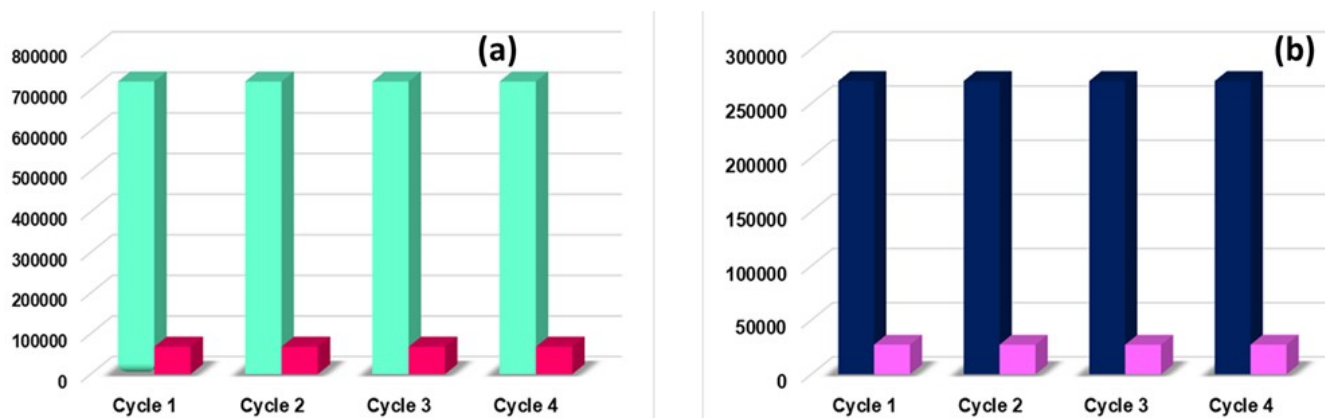

**Figure S30.** The Recyclability study for the pesticide sensing using the Tb (a) and Eu MOF

(b).

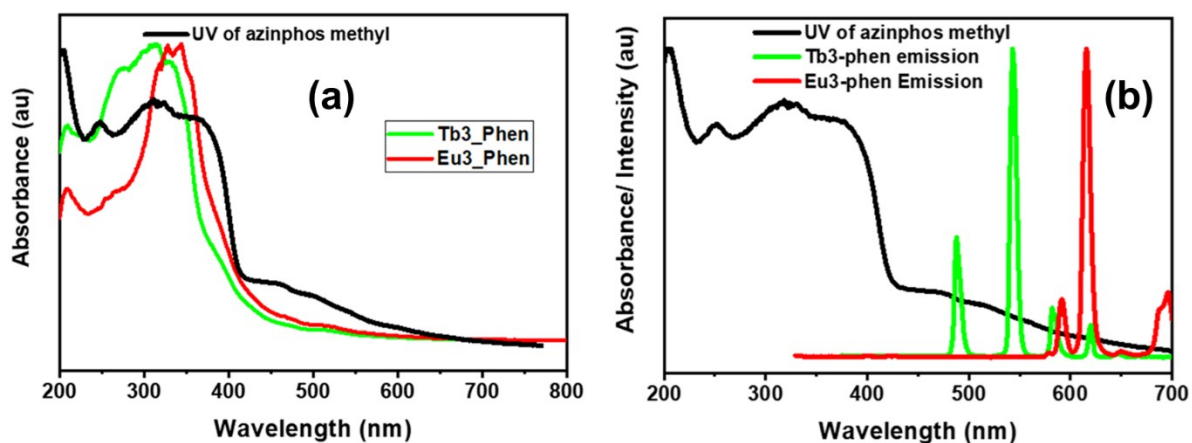

**Figure S31.** (a) Spectral overlap of the absorption spectra of the azinphos-methyl and the Tb and the Eu – phen MOF compounds. (b) The absorption bands of analytes along with the emission spectra of Tb MOF. Note the considerable overlap (see text).

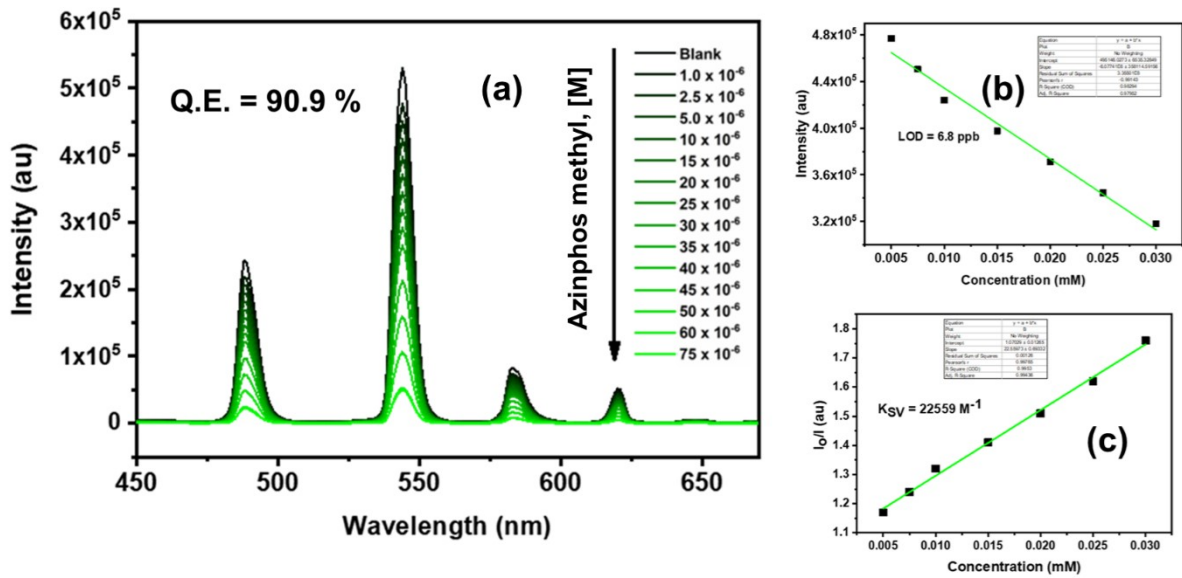

**Figure S32.** (a) Emission spectra of Tb - bpy MOF dispersed in water upon incremental addition of acetonitrile solution of azinphos- methyl ( $\lambda_{ex} = 350\text{nm}$ ). Final concentration of pesticide in the medium is indicated in the legend. (b) The LOD calculation graph for the pesticide sensing in Tb-bpy MOF (c) Plot of  $I_0/I$  of Tb - bpy MOFs (at 544 nm) vs concentration

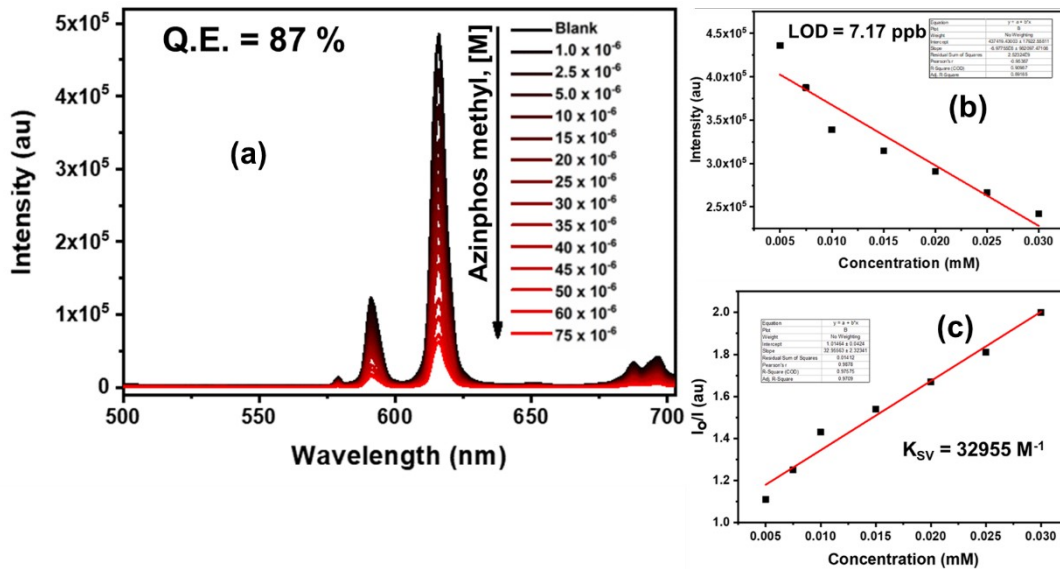

**Figure S33.** (a) Emission spectra of Eu -bpy MOF dispersed in water upon incremental addition of acetonitrile solution of Azinphos - methyl ( $\lambda_{ex} = 350\text{nm}$ ). Final concentration of pesticide in the medium is indicated in the legend. (b) The LOD calculation graph for the

pesticide sensing in Eu-bpy MOF (c) Plot of  $I_0/I$  of Eu-bpy MOFs (at 616 nm) vs concentration

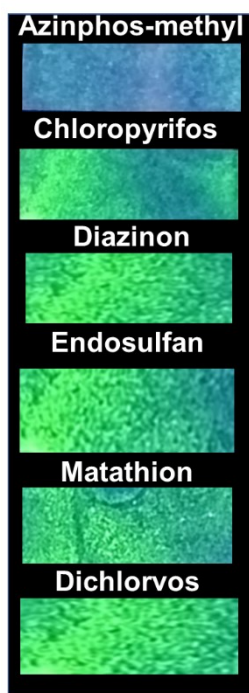

**Figure S34.** Colour of Tb-phen coated paper strips in presence of different pesticides (75  $\mu\text{M}$ ). Note: the green colour vanishes only in the presence of azinphos-methyl.

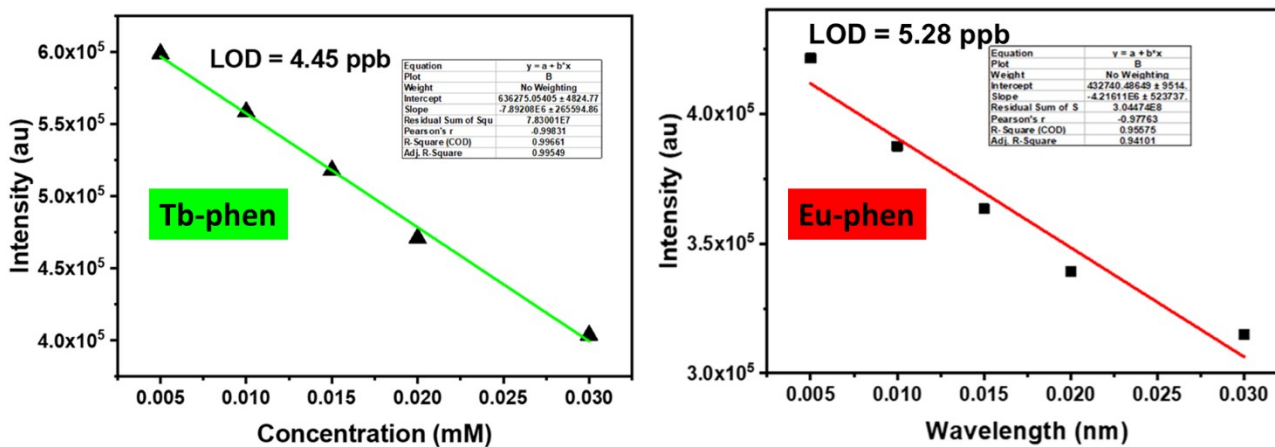

**Figure S35.** The LOD calculation graph for the azinphos-methyl using paper strips in Tb-phen and Eu-phen

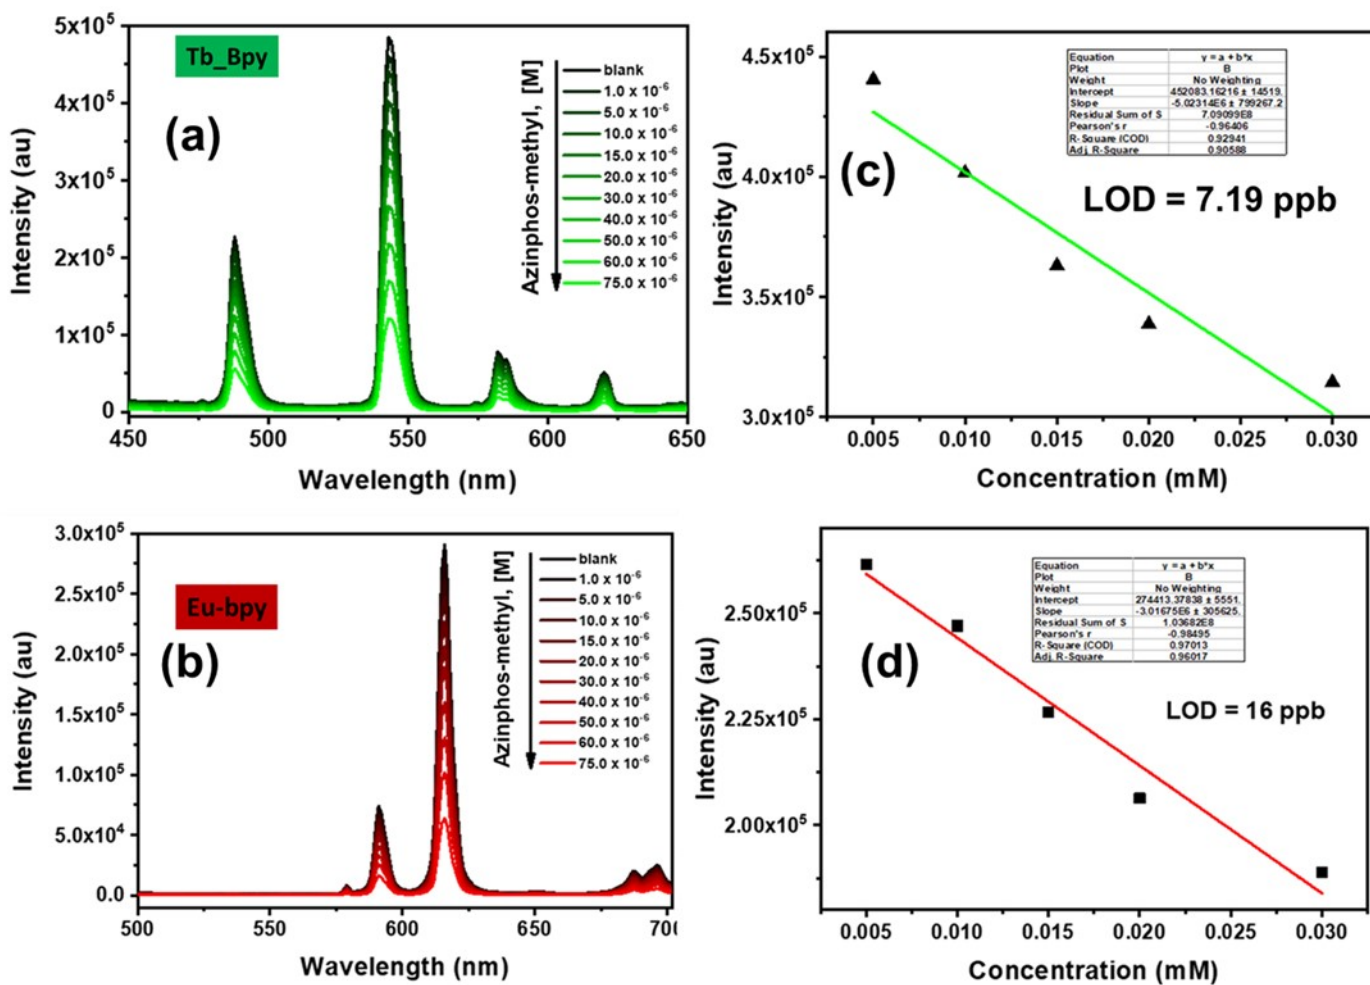

**Figure S36.** The decrease in luminescence intensity of the MOF coated paper strips dipped in different concentrations of azinphos-methyl solution (a) Tb-bpy (b) Eu-bpy and LOD values for the azinphos-methyl solution (c) Tb-bpy (d) Eu-bpy

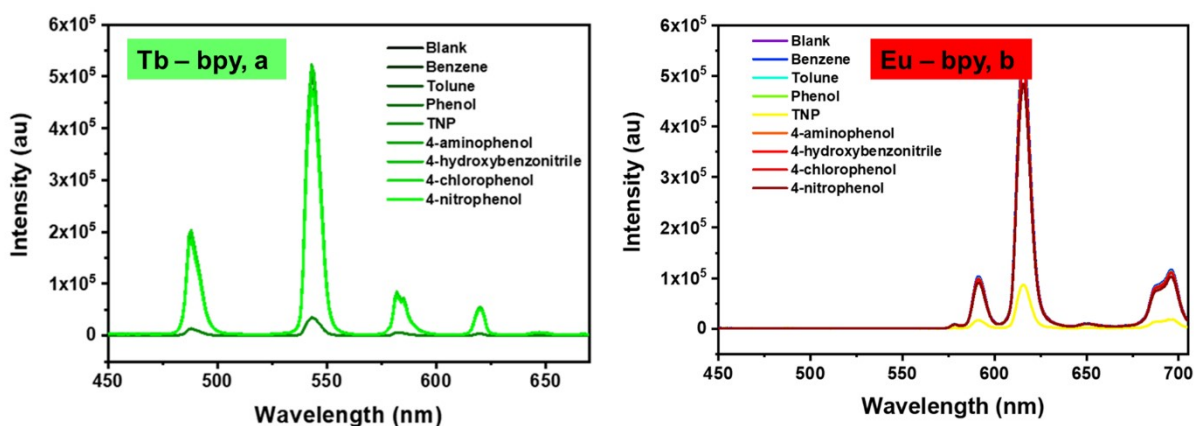

**Figure S37.** (a) Emission spectra of Tb-bpy compound (b) Emission spectra of Eu-bpy compound dispersed in water upon addition of acetonitrile solution of TNP and different Aromatic compound solutions benzene, toluene, phenol ( $\lambda_{\text{ex}} = 350 \text{ nm}$ ). Concentration of analytes are 100  $\mu\text{M}$  in the medium

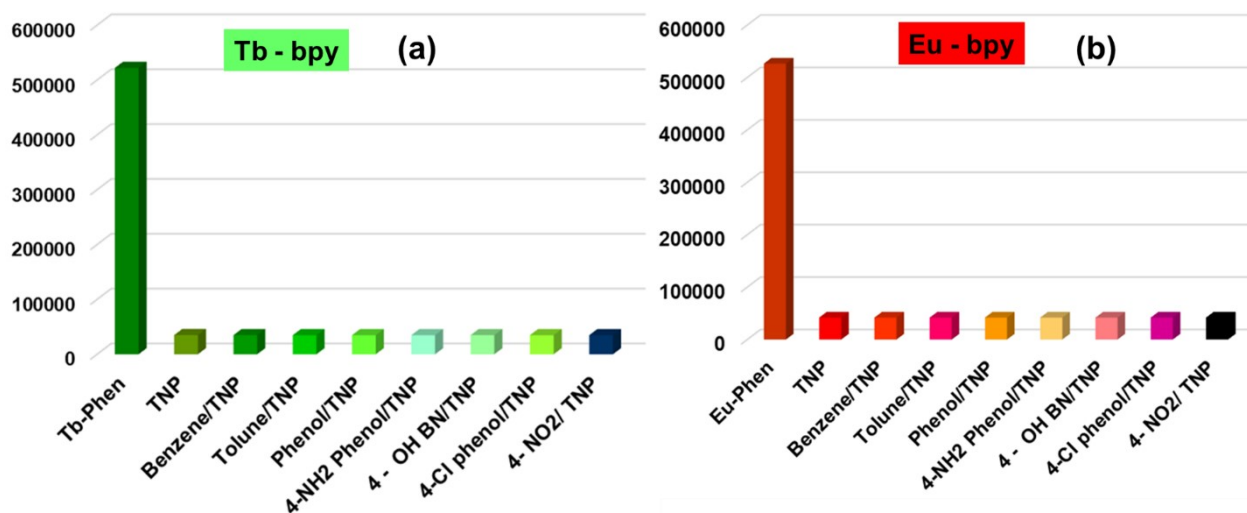

**Figure S38.** Comparison of the luminescence quenching effect of TNP in the presence of other aromatics (100  $\mu\text{M}$ ) using (a) Tb-bpy MOF and (b) Eu-bpy MOF

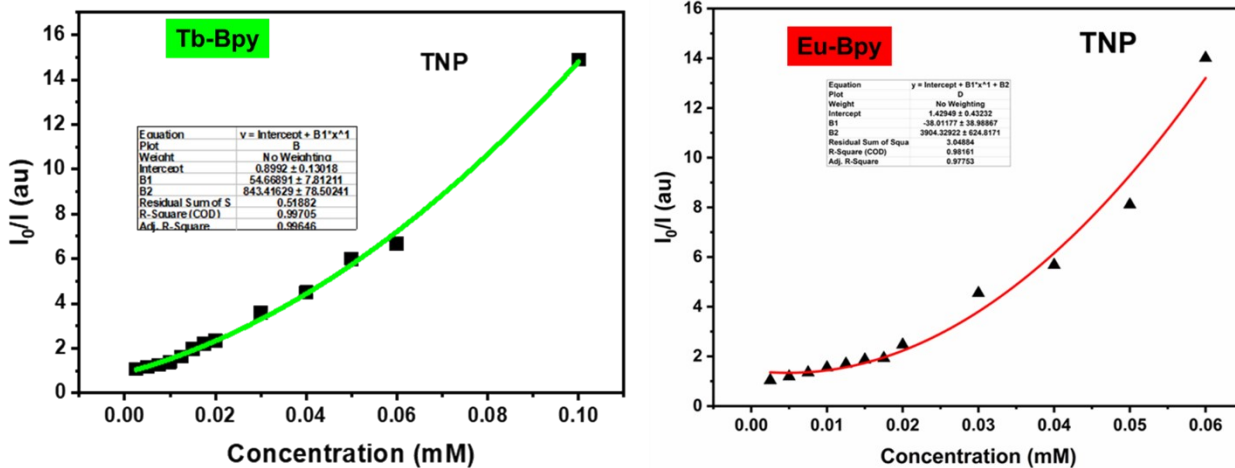

Figure. S39. Stern-Volmer plots for (a) Tb and (b) Eu – bpy MOFs at high concentration of Trinitrophenol.

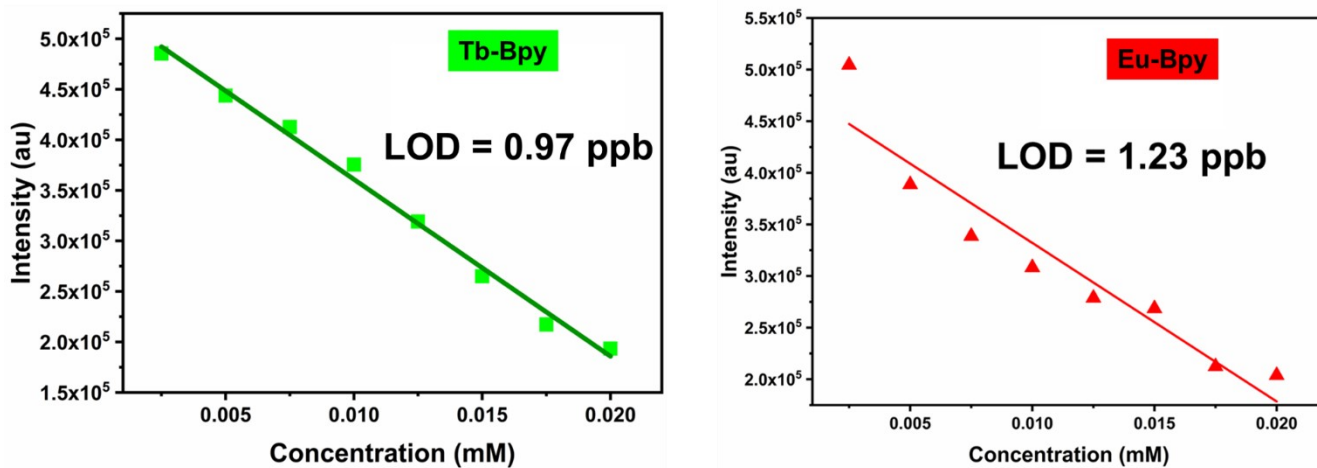

Figure 40. The LOD calculation graph for the TNP sensing in Tb-bpy and Eu bpy



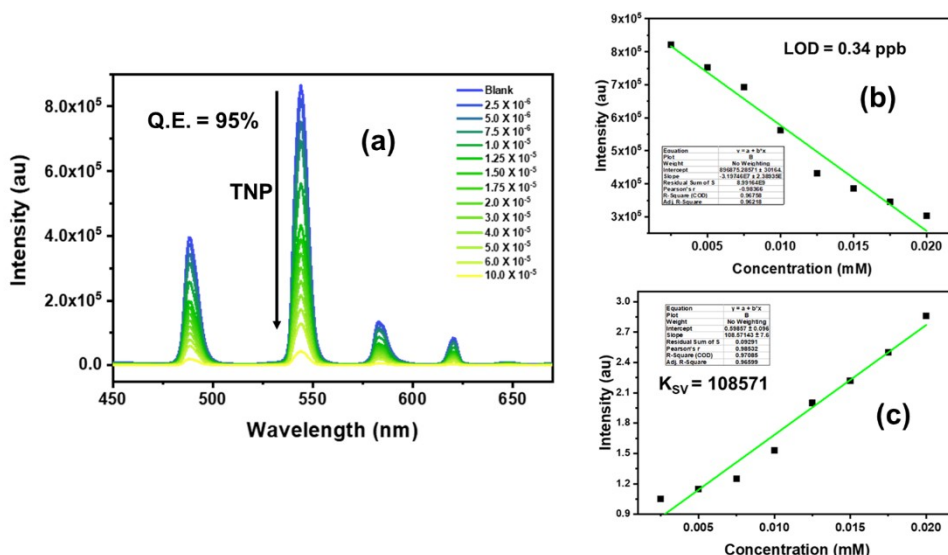

**Figure S41.** (a) Emission spectra of Tb-phen MOF dispersed in water upon incremental addition of acetonitrile solution of Trinitrophenol ( $\lambda_{\text{ex}} = 350\text{nm}$ ). Final concentration of TNP in the medium is indicated in the legend. (b) The LOD calculation graph for the TNP sensing in Tb-phen MOF (c) Plot of  $I_0/I$  of Tb-phen MOF (at 544 nm) vs concentration

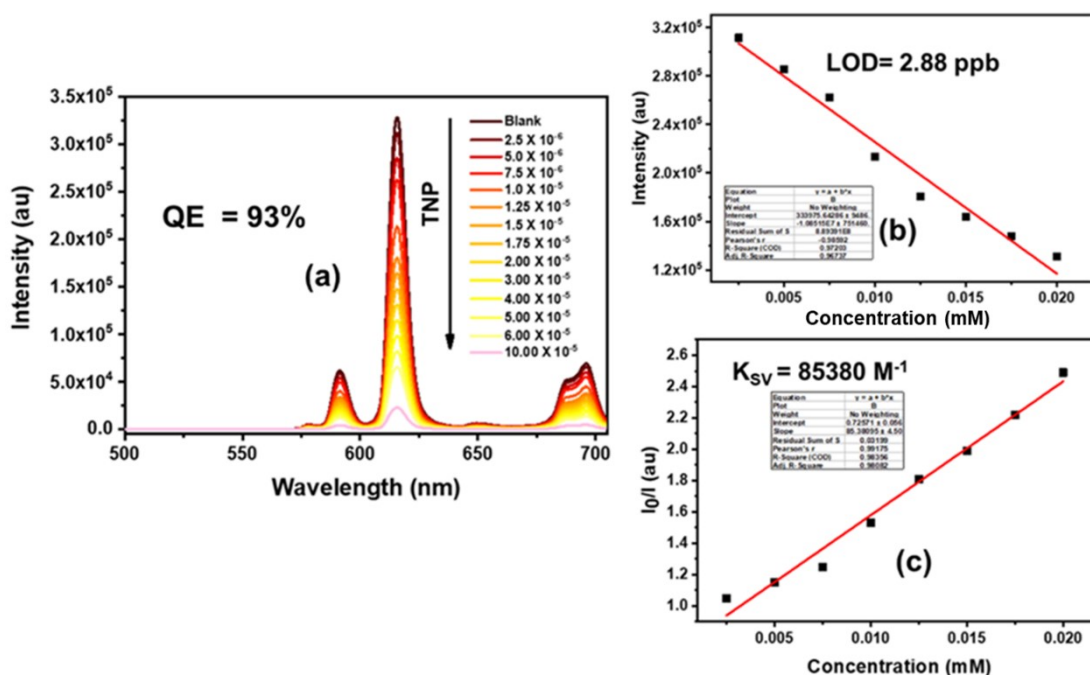

**Figure S42.** (a) Emission spectra of Eu-phen MOF dispersed in water upon incremental addition of acetonitrile solution of trinitrophenol ( $\lambda_{\text{ex}} = 350\text{nm}$ ). Final concentration of TNP in the medium is indicated in the legend. (b) The LOD calculation graph for the TNP sensing in Eu-phen MOF (c) Plot of  $I_0/I$  of Eu-bpy MOFs (at 616 nm) vs concentration

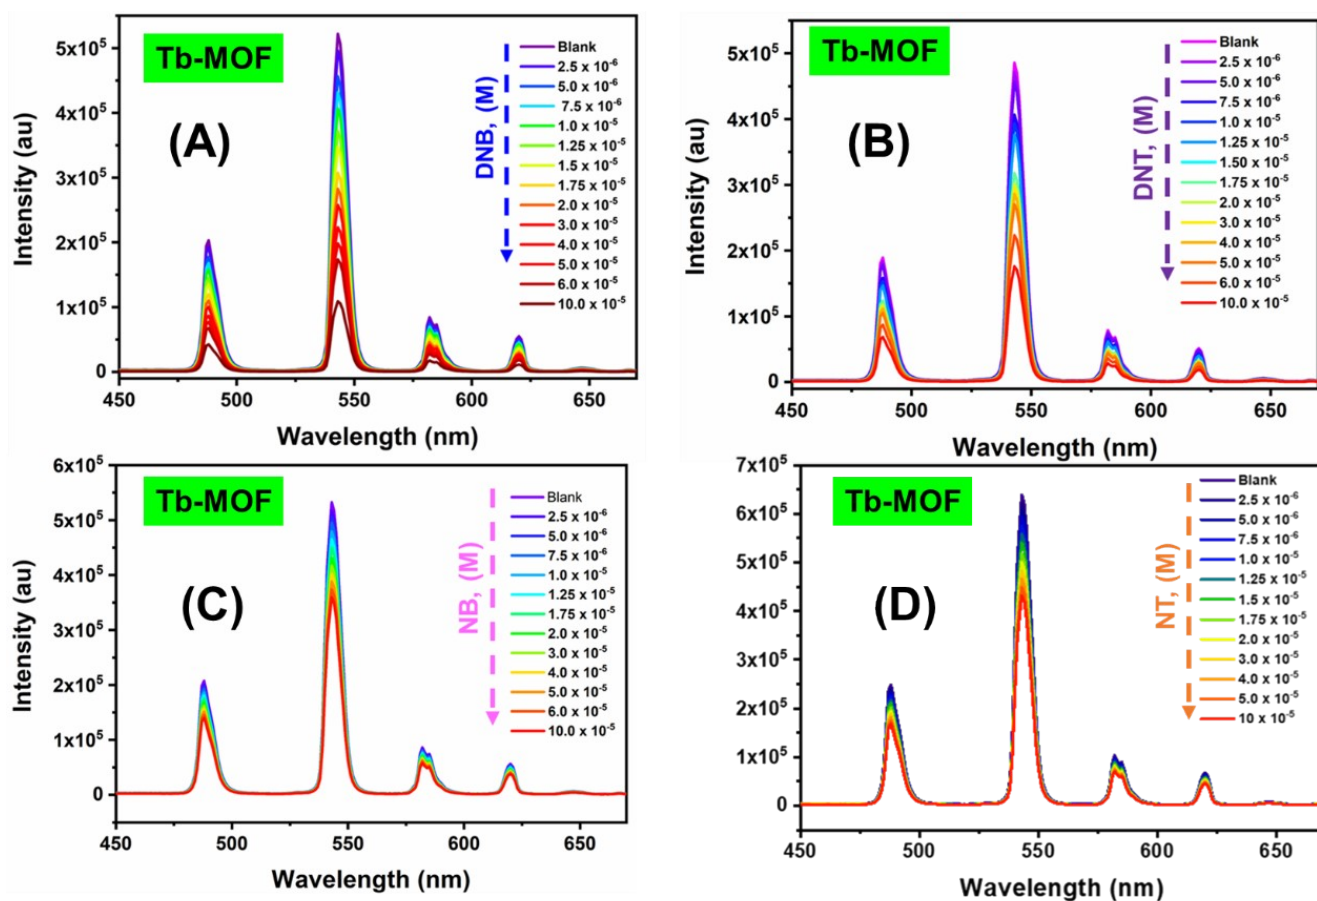

**Figure S43.** Emission spectra of Tb-bpy MOF dispersed in acetonitrile upon incremental addition of (a) DNB (b) DNT (c) NB (d) NT solution ( $\lambda_{ex} = 350$  nm). The final concentration of all the nitroaromatics in the medium is indicated in the legend. The Quenching Efficiency is 77 %, 52.2 %, 32.49 %, 32.28 % respectively.

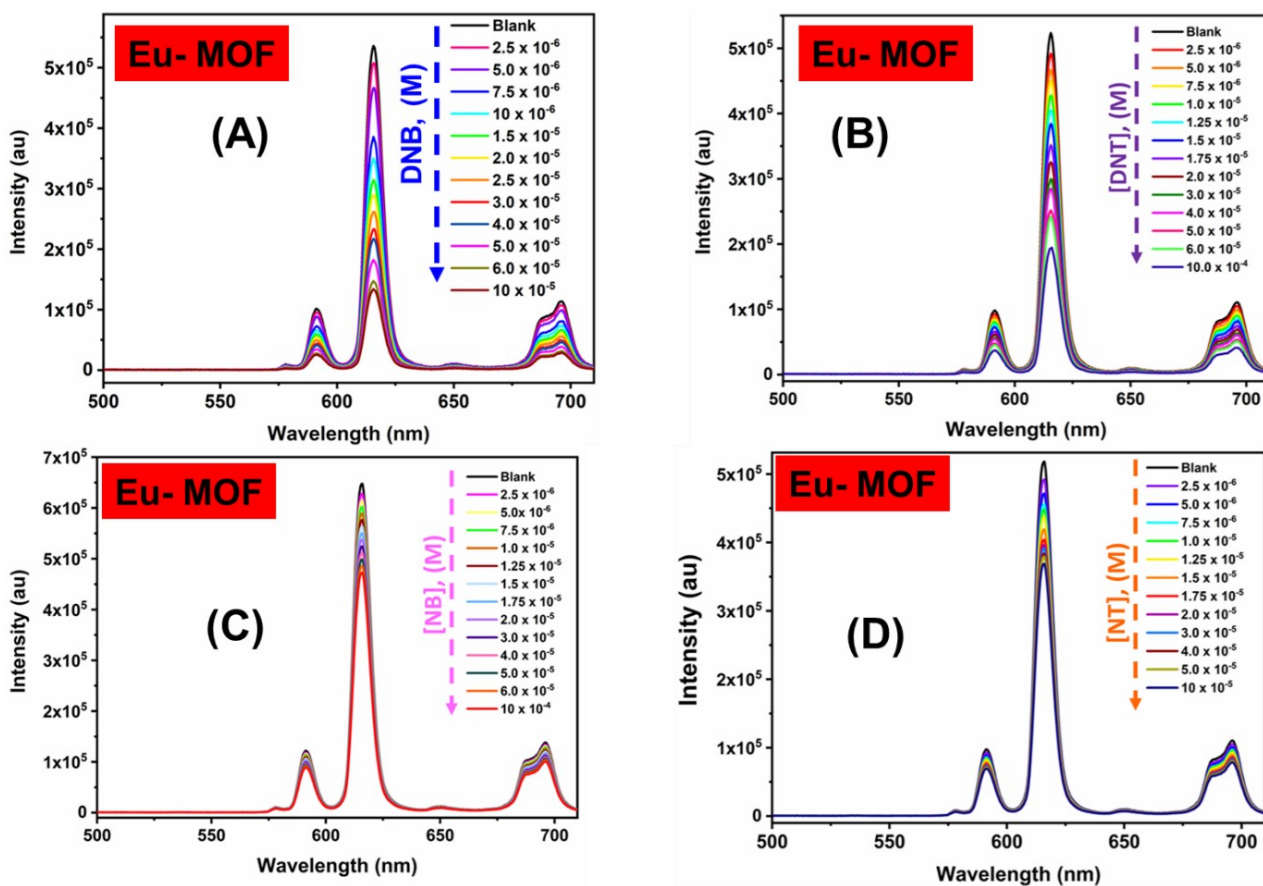

**Figure S44.** Emission spectra of Eu-bpy MOF dispersed in acetonitrile upon incremental addition of (a) DNB (b) DNT (c) NB (d) NT solution ( $\lambda_{\text{ex}} = 350$  nm). The final concentration of all the nitroaromatics in the medium is indicated in the legend. The Quenching Efficiency is 75 %, 63.5 %, 28.68 %, 27.62 % respectively.

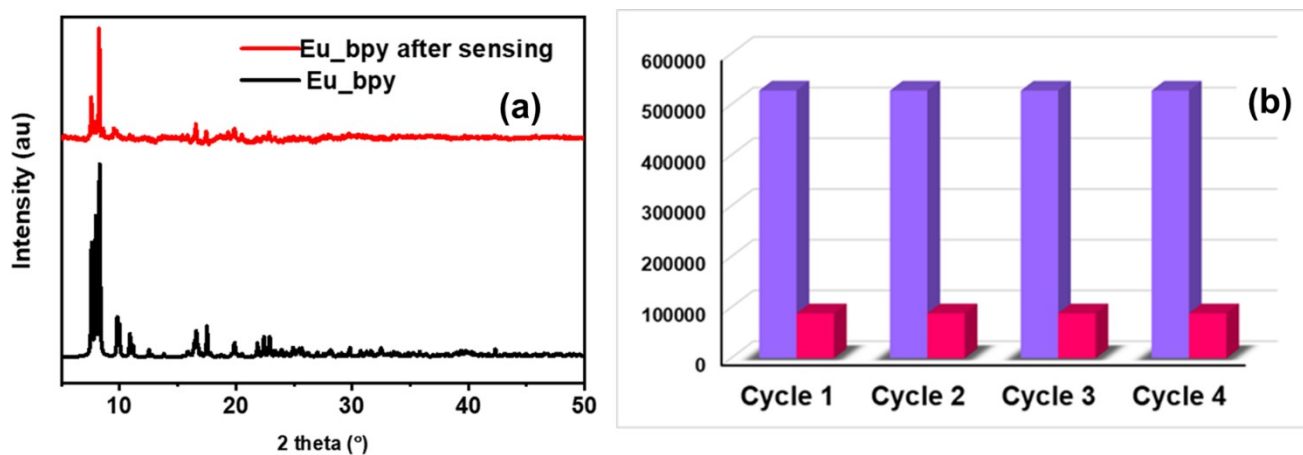

**Figure S45.** The structural retention of the Eu – bpy MOF after nitroaromatic sensing (a) and recyclability study for the nitroaromatic sensing using the Eu MOF (b).

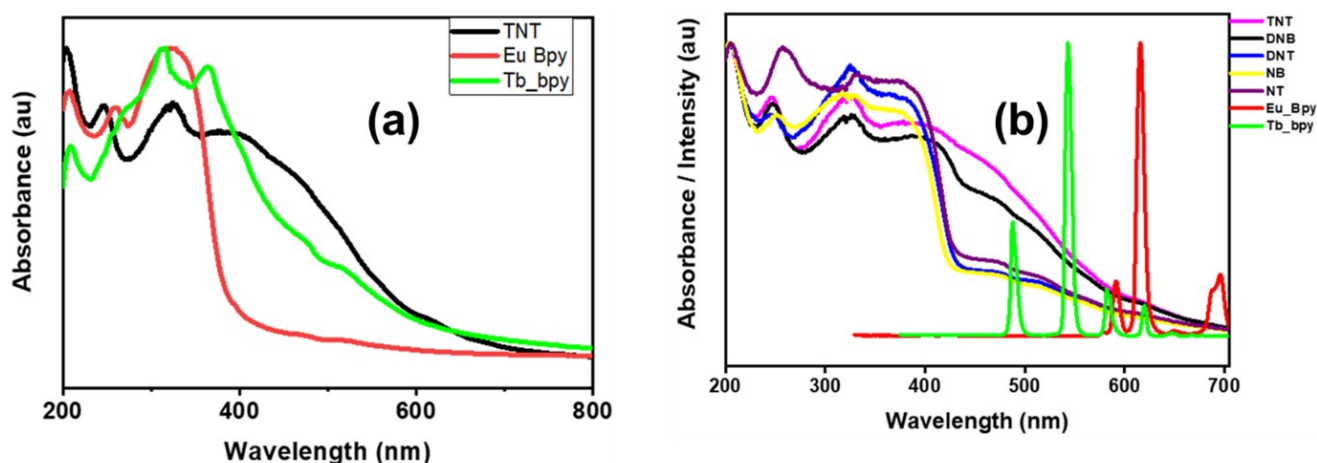

**Figure S46.** (a) Spectral overlap of the absorption spectra of the trinitrotoluene and the Tb and the Eu – bpy MOF compounds. (b) The absorption bands of analytes along with the emission spectra of Eu and Tb MOF. Note the considerable overlap (see text).

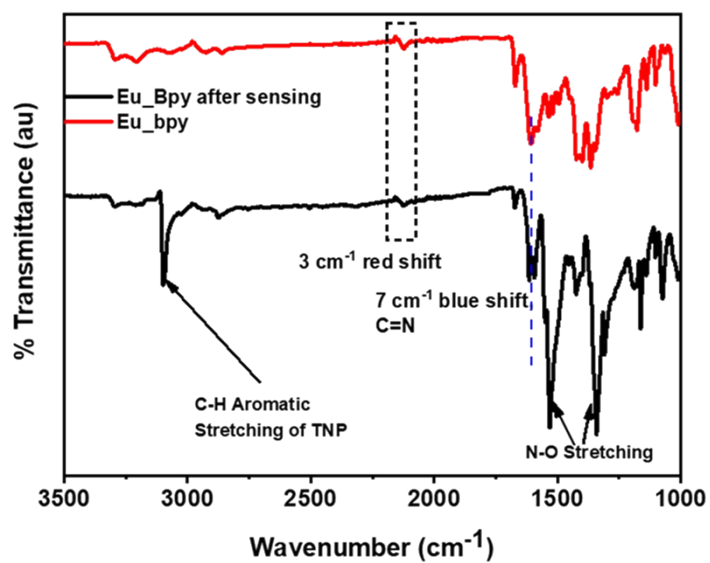

**Figure S47.** IR spectra of Eu – bpy MOF before and after the pesticide sensing. Note: the shift in the different spectra.

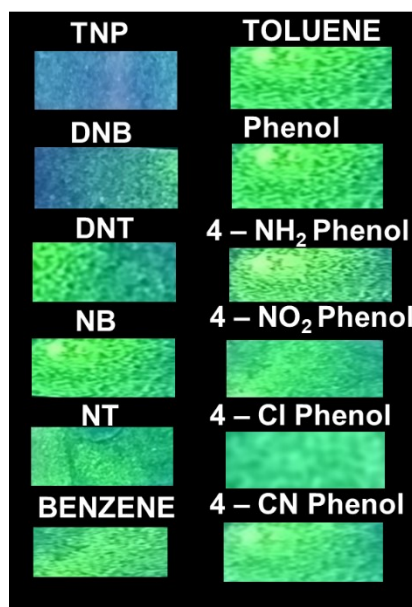

**Figure S48.** Colour of Tb-bpy coated paper strips in presence of different aromatics. Note: the green colour vanishes only in the presence of TNP

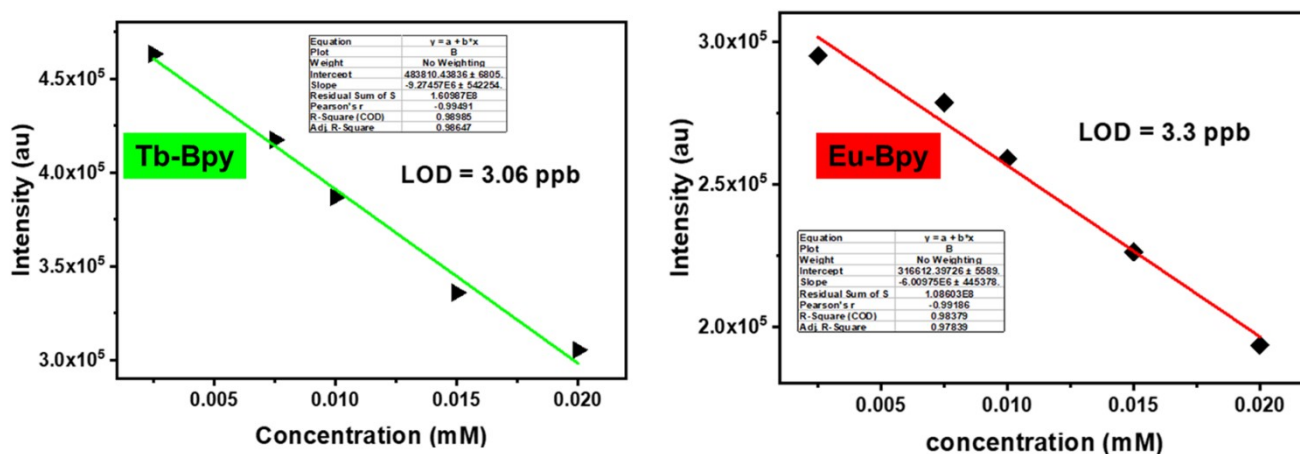

**Figure S49:** The LOD calculation graph for the TNP using paper strips in Tb-bpy and Eu-bpy.

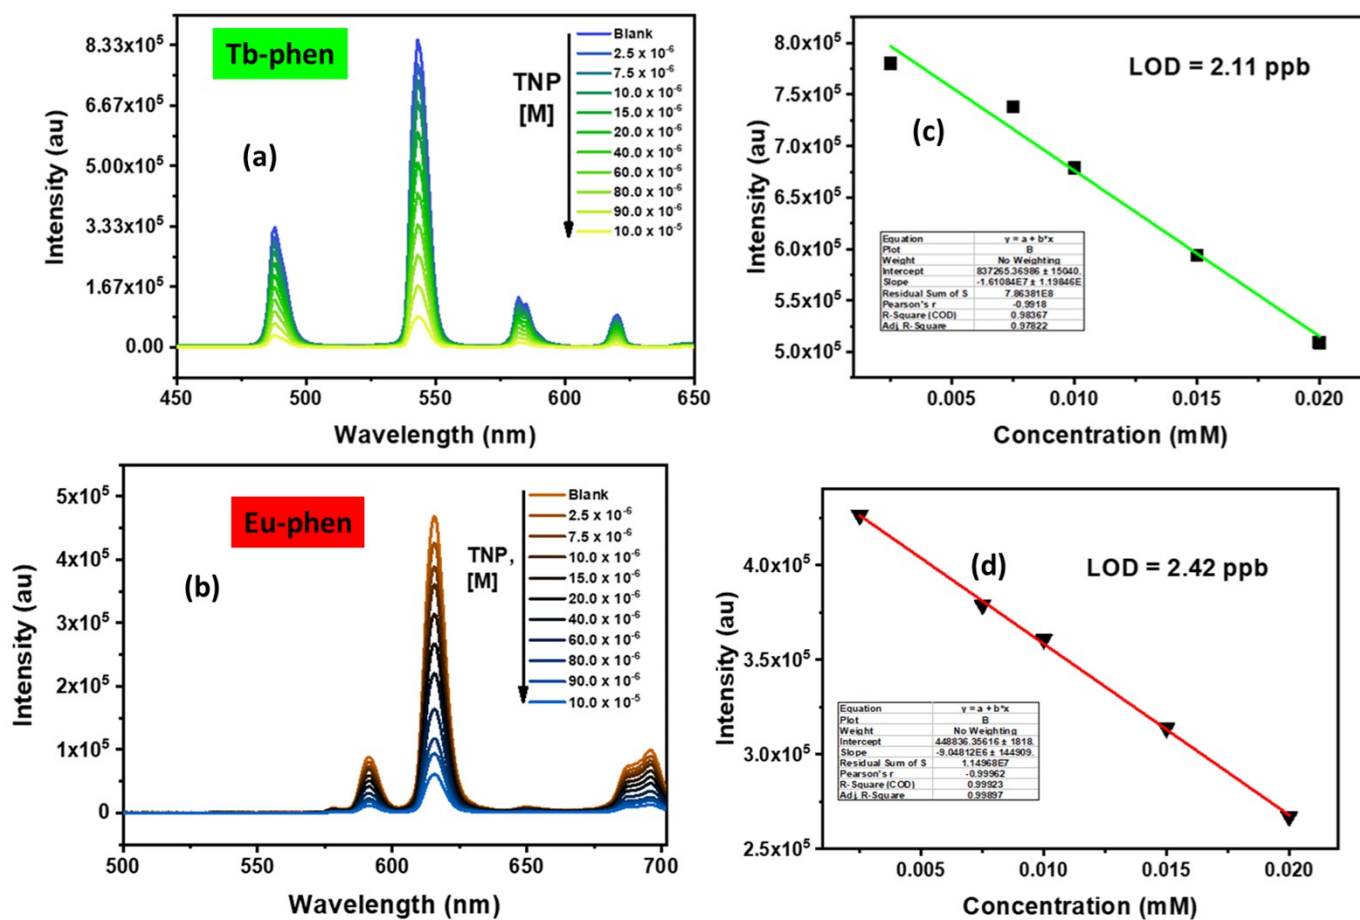

**Figure S50:** The decrease in luminescence intensity of the MOF coated paper strips dipped in different concentrations of TNP solution (a) Tb-phen (b) Eu-phen and LOD values for the TNP solution (c) Tb- phen (d) Eu- phen

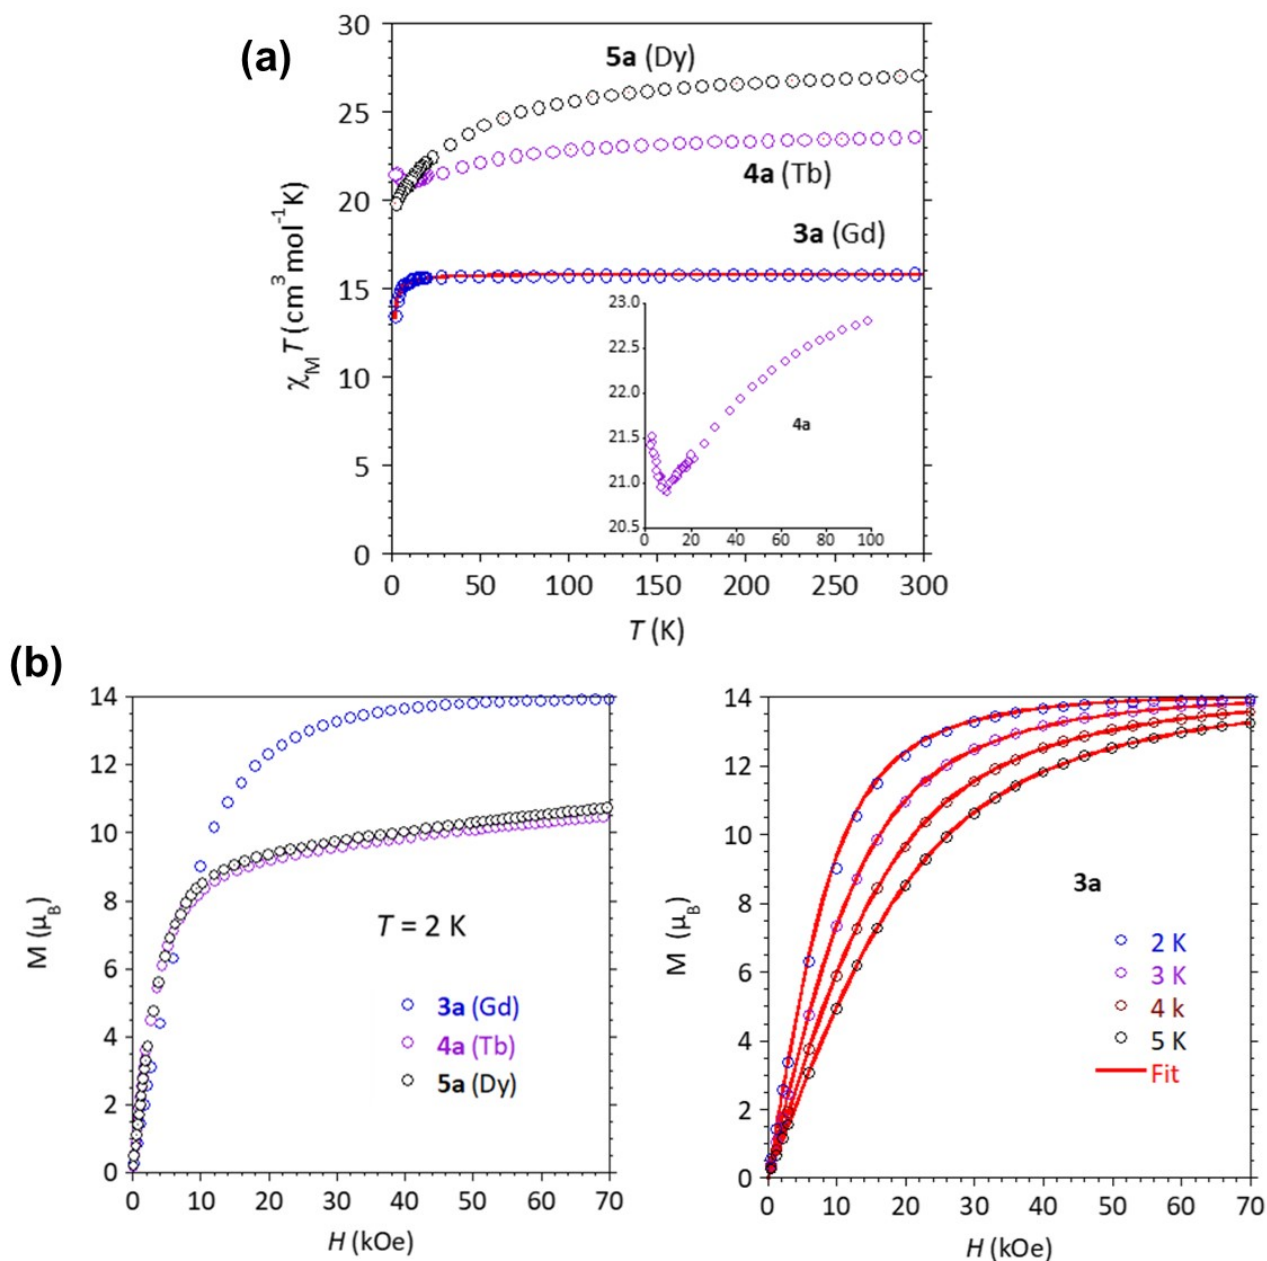

**Figure S51.** (a) Experimental  $\chi_M T$  versus  $T$  and (b)  $M$  versus  $H$  behaviors for **3a**, **4a**, **5a**. The insert in (a) is the low temperature behavior for the Tb derivative. The full line is the calculated behavior for the Gd compound with best-fit parameters  $J_{\text{GdGd}} = -0.041 \pm 0.001 \text{ cm}^{-1}$ ,  $g = 2.00$  ( $H = -J\mathbf{S}_{\text{Gd1}} \cdot \mathbf{S}_{\text{Gd2}}$ ).



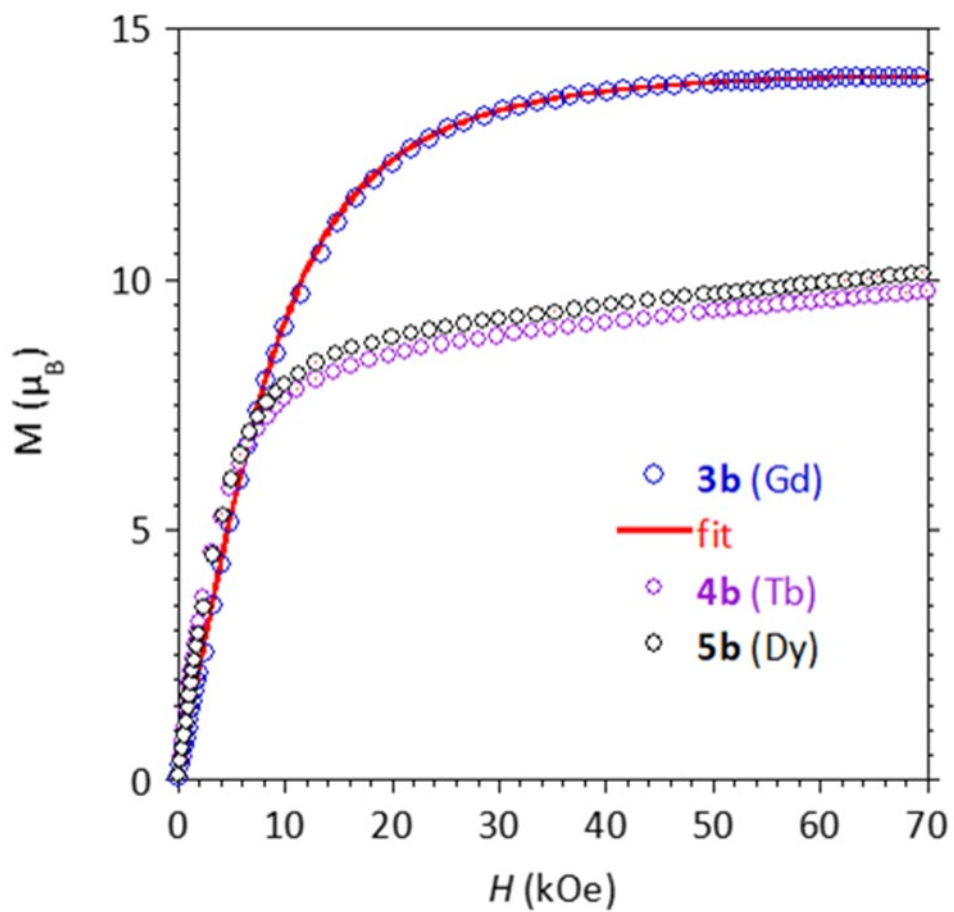

**Figure S52.** Field dependence of the magnetization of 3b, 4b, and 5b recorded at 2 K.

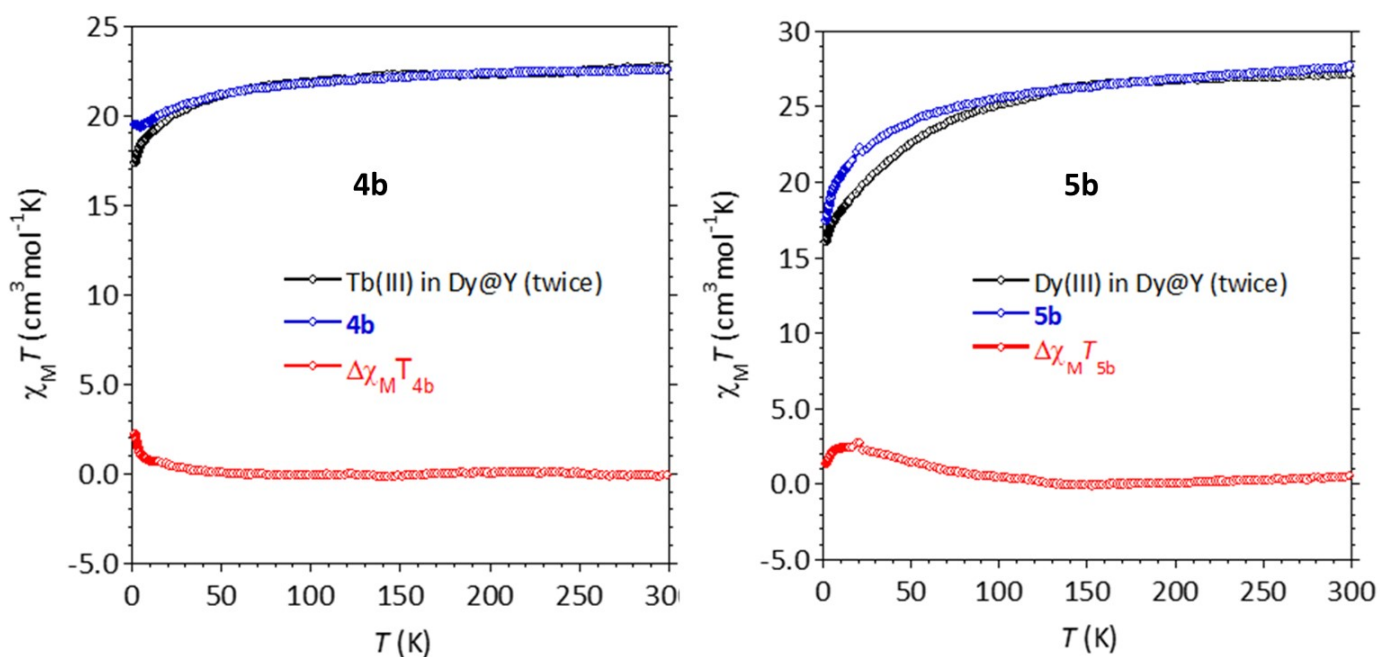

**Figure S53.** Qualitative Comparison of the  $\chi_M T$  versus  $T$  behaviors for (a) **4b** and (b) **5b** with the behaviors for isolated Tb(III) and Dy(III) in homologous Y-MOF revealing the contribution ( $\Delta\chi_M T$ ) of the exchange interaction. The contribution of the exchange interaction ( $\Delta\chi_M T$  in the plots) was obtained by subtraction the intrinsic magnetic behavior of two isolated Ln ions (i.e.  $2 \times \chi_M T$  of Ln@Y, black trace below) from  $\chi_M T$  of **4b** or **5b**.<sup>21-23</sup> The increase of  $\Delta\chi_M T$  at low  $T$  is indicative for a ferromagnetic interaction.

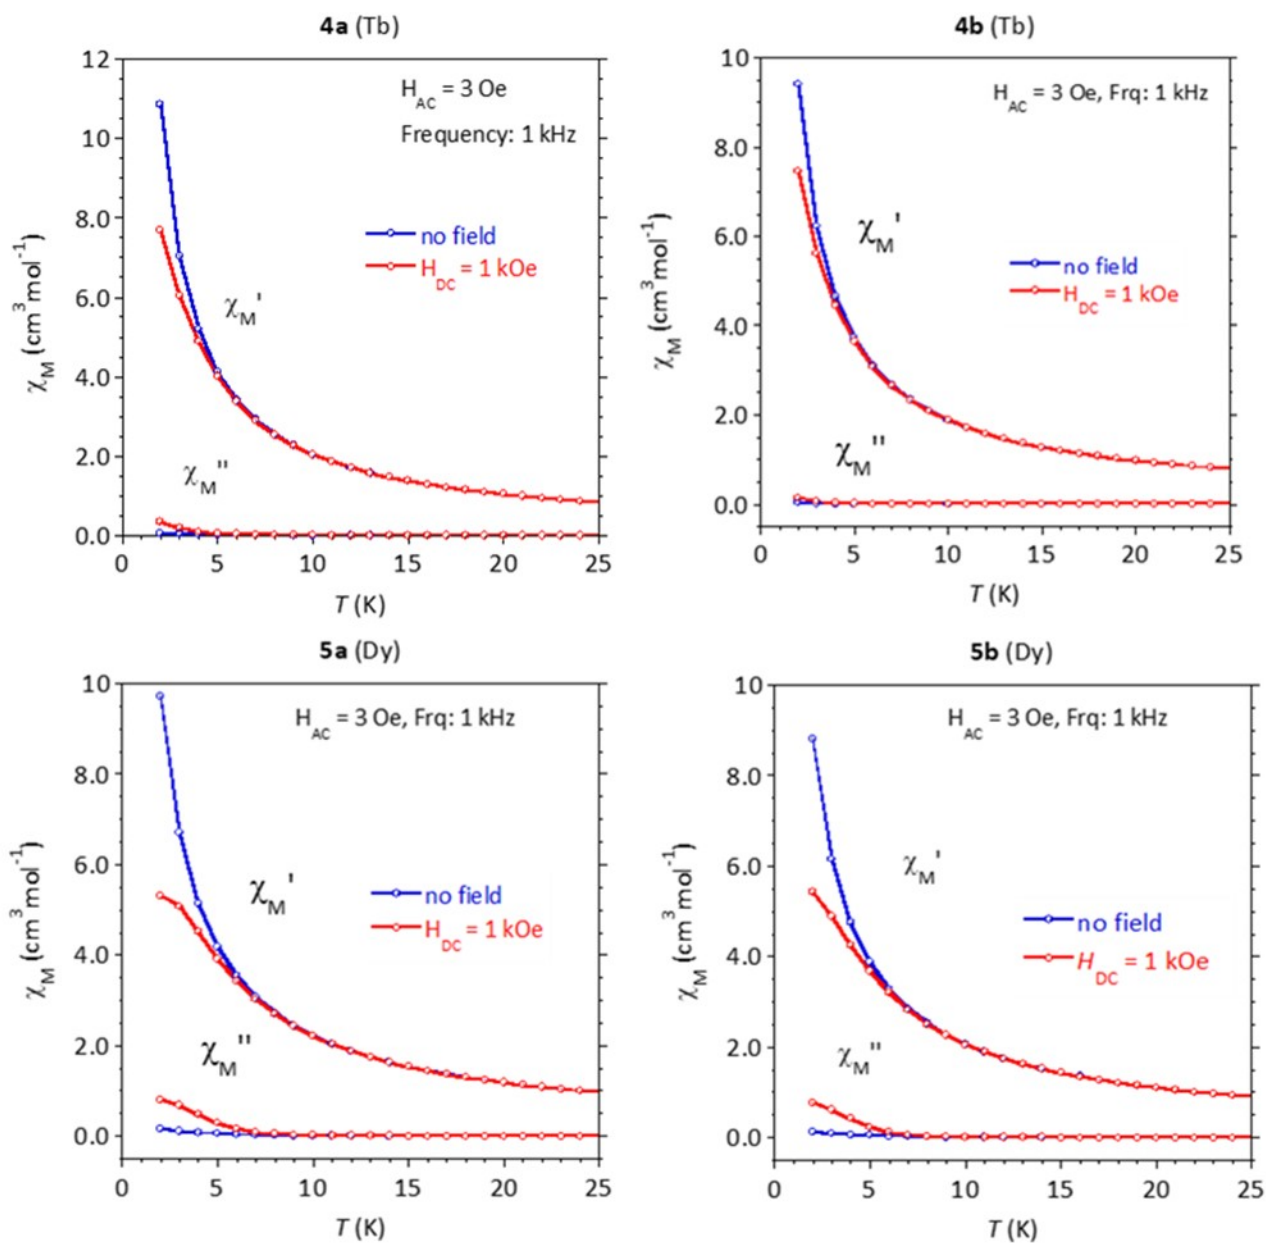

**Figure S54.** AC susceptibility behaviors for **4a, b** and **5a, b** in absence and with applied static magnetic field ( $H_{AC} = 3$  Oe,  $\nu = 1$  kHz).

## References:

- 1 K. Manna, B. Suresh Kumar, T. Maity and S. Natarajan, *ChemNanoMat*, 2022, **8**, e202200081.
- 2 T. P. Gerasimova and S. A. Katsyuba, *Dalt. Trans.*, 2013, **42**, 1787–1797.
- 3 A. Schweig and W. Thiel, *J. Electron Spectros. Relat. Phenomena*, 1974, **3**, 27–38.
- 4 M. M. Campos-Vallette, R. E. Clavijo, F. Mendizabal, W. Zamudio, R. Baraona and G. Diaz, *Vib. Spectrosc.*, 1996, **12**, 37–44.
- 5 P. G. Sammes and G. Yahiolglu, *Chem. Soc. Rev.*, 1994, **23**, 327–334.
- 6 M. S. Henry and M. Z. Hoffman, *J. Phys. Chem.*, 1979, **83**, 618–625.
- 7 G. Accorsi, A. Listorti, K. Yoosaf and N. Armaroli, *Chem. Soc. Rev.*, 2009, **38**, 1690–1700.
- 8 S. Zálíš, C. Consani, A. El Nahhas, A. Cannizzo, M. Chergui, F. Hartl and A. Vlček, *Inorganica Chim. Acta*, 2011, **374**, 578–585.
- 9 N. Sabbatini, M. Guardigli, I. Manet, F. Bolletta and R. Ziessel, *Inorg. Chem.*, 1994, **33**, 955–959.
- 10 Q.-Y. Yang, K. Wu, J.-J. Jiang, C.-W. Hsu, M. Pan, J.-M. Lehn and C.-Y. Su, *Chem. Commun.*, 2014, **50**, 7702–7704.
- 11 H. He, F. Sun, T. Borjigin, N. Zhao and G. Zhu, *Dalt. Trans.*, 2014, **43**, 3716–3721.
- 12 J.-C. Yin, Z. Chang, N. Li, J. He, Z.-X. Fu and X.-H. Bu, *ACS Appl. Mater. Interfaces*, 2020, **12**, 51589–51597.
- 13 L. Xu, Y. Xu, X. Li, Z. Wang, T. Sun and X. Zhang, *Dalt. Trans.*, 2018, **47**, 16696–16703.
- 14 R. Peña-Rodríguez, J. A. Molina-González, H. Desirena-Enriquez, E. Armenta-Jaime, J. M. Rivera and S. E. Castillo-Blum, *J. Mater. Chem. C*, 2021, **9**, 15891–15899.
- 15 C. Y. Sun, X. L. Wang, X. Zhang, C. Qin, P. Li, Z. M. Su, D. X. Zhu, G. G. Shan, K. Z. Shao, H. Wu and J. Li, *Nat. Commun.*, 2013, **4**, 1–8.
- 16 L. L. da Luz, B. F. Lucena Viana, G. C. O. da Silva, C. C. Gatto, A. M. Fontes, M. Malta, I. T. Weber, M. O. Rodrigues and S. A. Júnior, *CrystEngComm*, 2014, **16**, 6914–6918.
- 17 D.-H. Chen, A. E. Sedykh, G. E. Gomez, B. L. Neumeier, J. C. C. Santos, V. Gvilava, R. Maile, C. Feldmann, C. Wöll, C. Janiak, K. Müller-Buschbaum and E. Redel, *Adv. Mater. Interfaces*, 2020, **7**, 2000929.
- 18 M.-L. Ma, C. Ji and S.-Q. Zang, *Dalt. Trans.*, 2013, **42**, 10579–10586.
- 19 Y. Wei, R. Sa and K. Wu, *Dalt. Trans.*, 2016, **45**, 18661–18667.
- 20 K. Manna, J.-P. Sutter and S. Natarajan, *Inorg. Chem.*, , DOI:10.1021/acs.inorgchem.2c02611.
- 21 M. L. Kahn, J.-P. Sutter, S. Golhen, P. Guionneau, L. Ouahab, O. Kahn and D. Chasseau, *J. Am. Chem. Soc.*, 2000, **122**, 3413–3421.
- 22 J. Sutter, M. L. Kahn and O. Kahn, *Adv. Mater.*, 1999, **11**, 863–865.
- 23 J. Sutter and M. L. Kahn, *Magn. Mol. to Mater. 5 Vol. Set*, 2004, 161–187.
